# Supplementary material for: Very long intergenic non-coding (vlinc) RNAs directly regulate multiple genes in cis and trans
Source: PubMed Central journal article supplement (PMC8139166; doi:10.1186/s12915-021-01044-x), 2021-05-20
Supplement: 12915_2021_1044_MOESM3_ESM.pdf [file 12915_2021_1044_MOESM3_ESM.pdf]

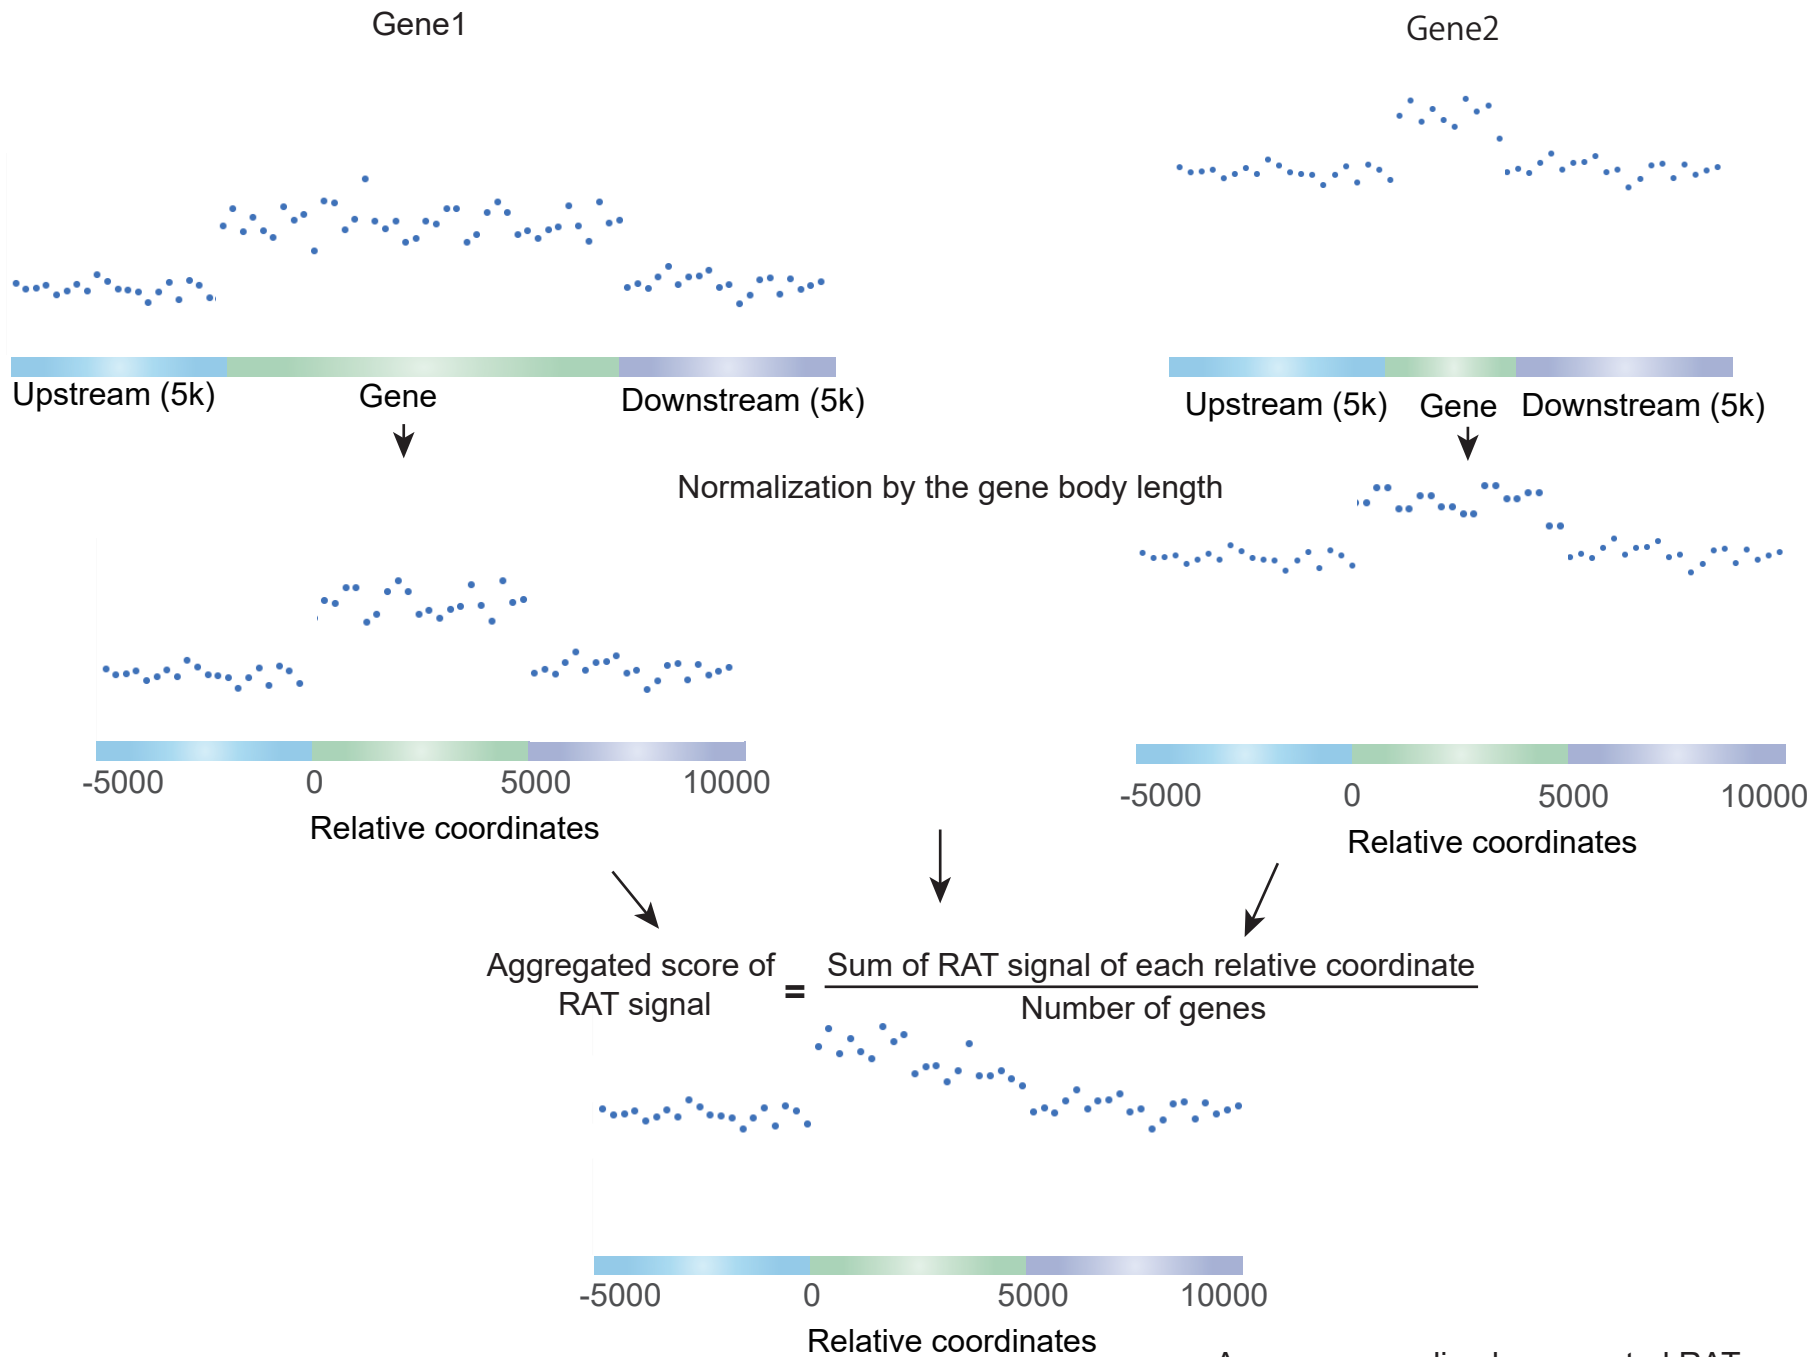

Aggregated score of RAT signal =  $\frac{\text{Sum of RAT signal of each relative coordinate}}{\text{Number of genes}}$

- Average normalized aggregated RAT score (ANARS):
- Step1. Normalization by the total number of reads
  - Step2. Substraction of non-oligo control for each replica
  - Step3. Averaging between the two replicas
  - Step4: Normalization by the gene body length
  - Step5: Aggregation of the score of RAT signal
