# Supplementary material for: Very long intergenic non-coding (vlinc) RNAs directly regulate multiple genes in cis and trans
Source: PubMed Central journal article supplement (PMC8139166; doi:10.1186/s12915-021-01044-x), 2021-05-20

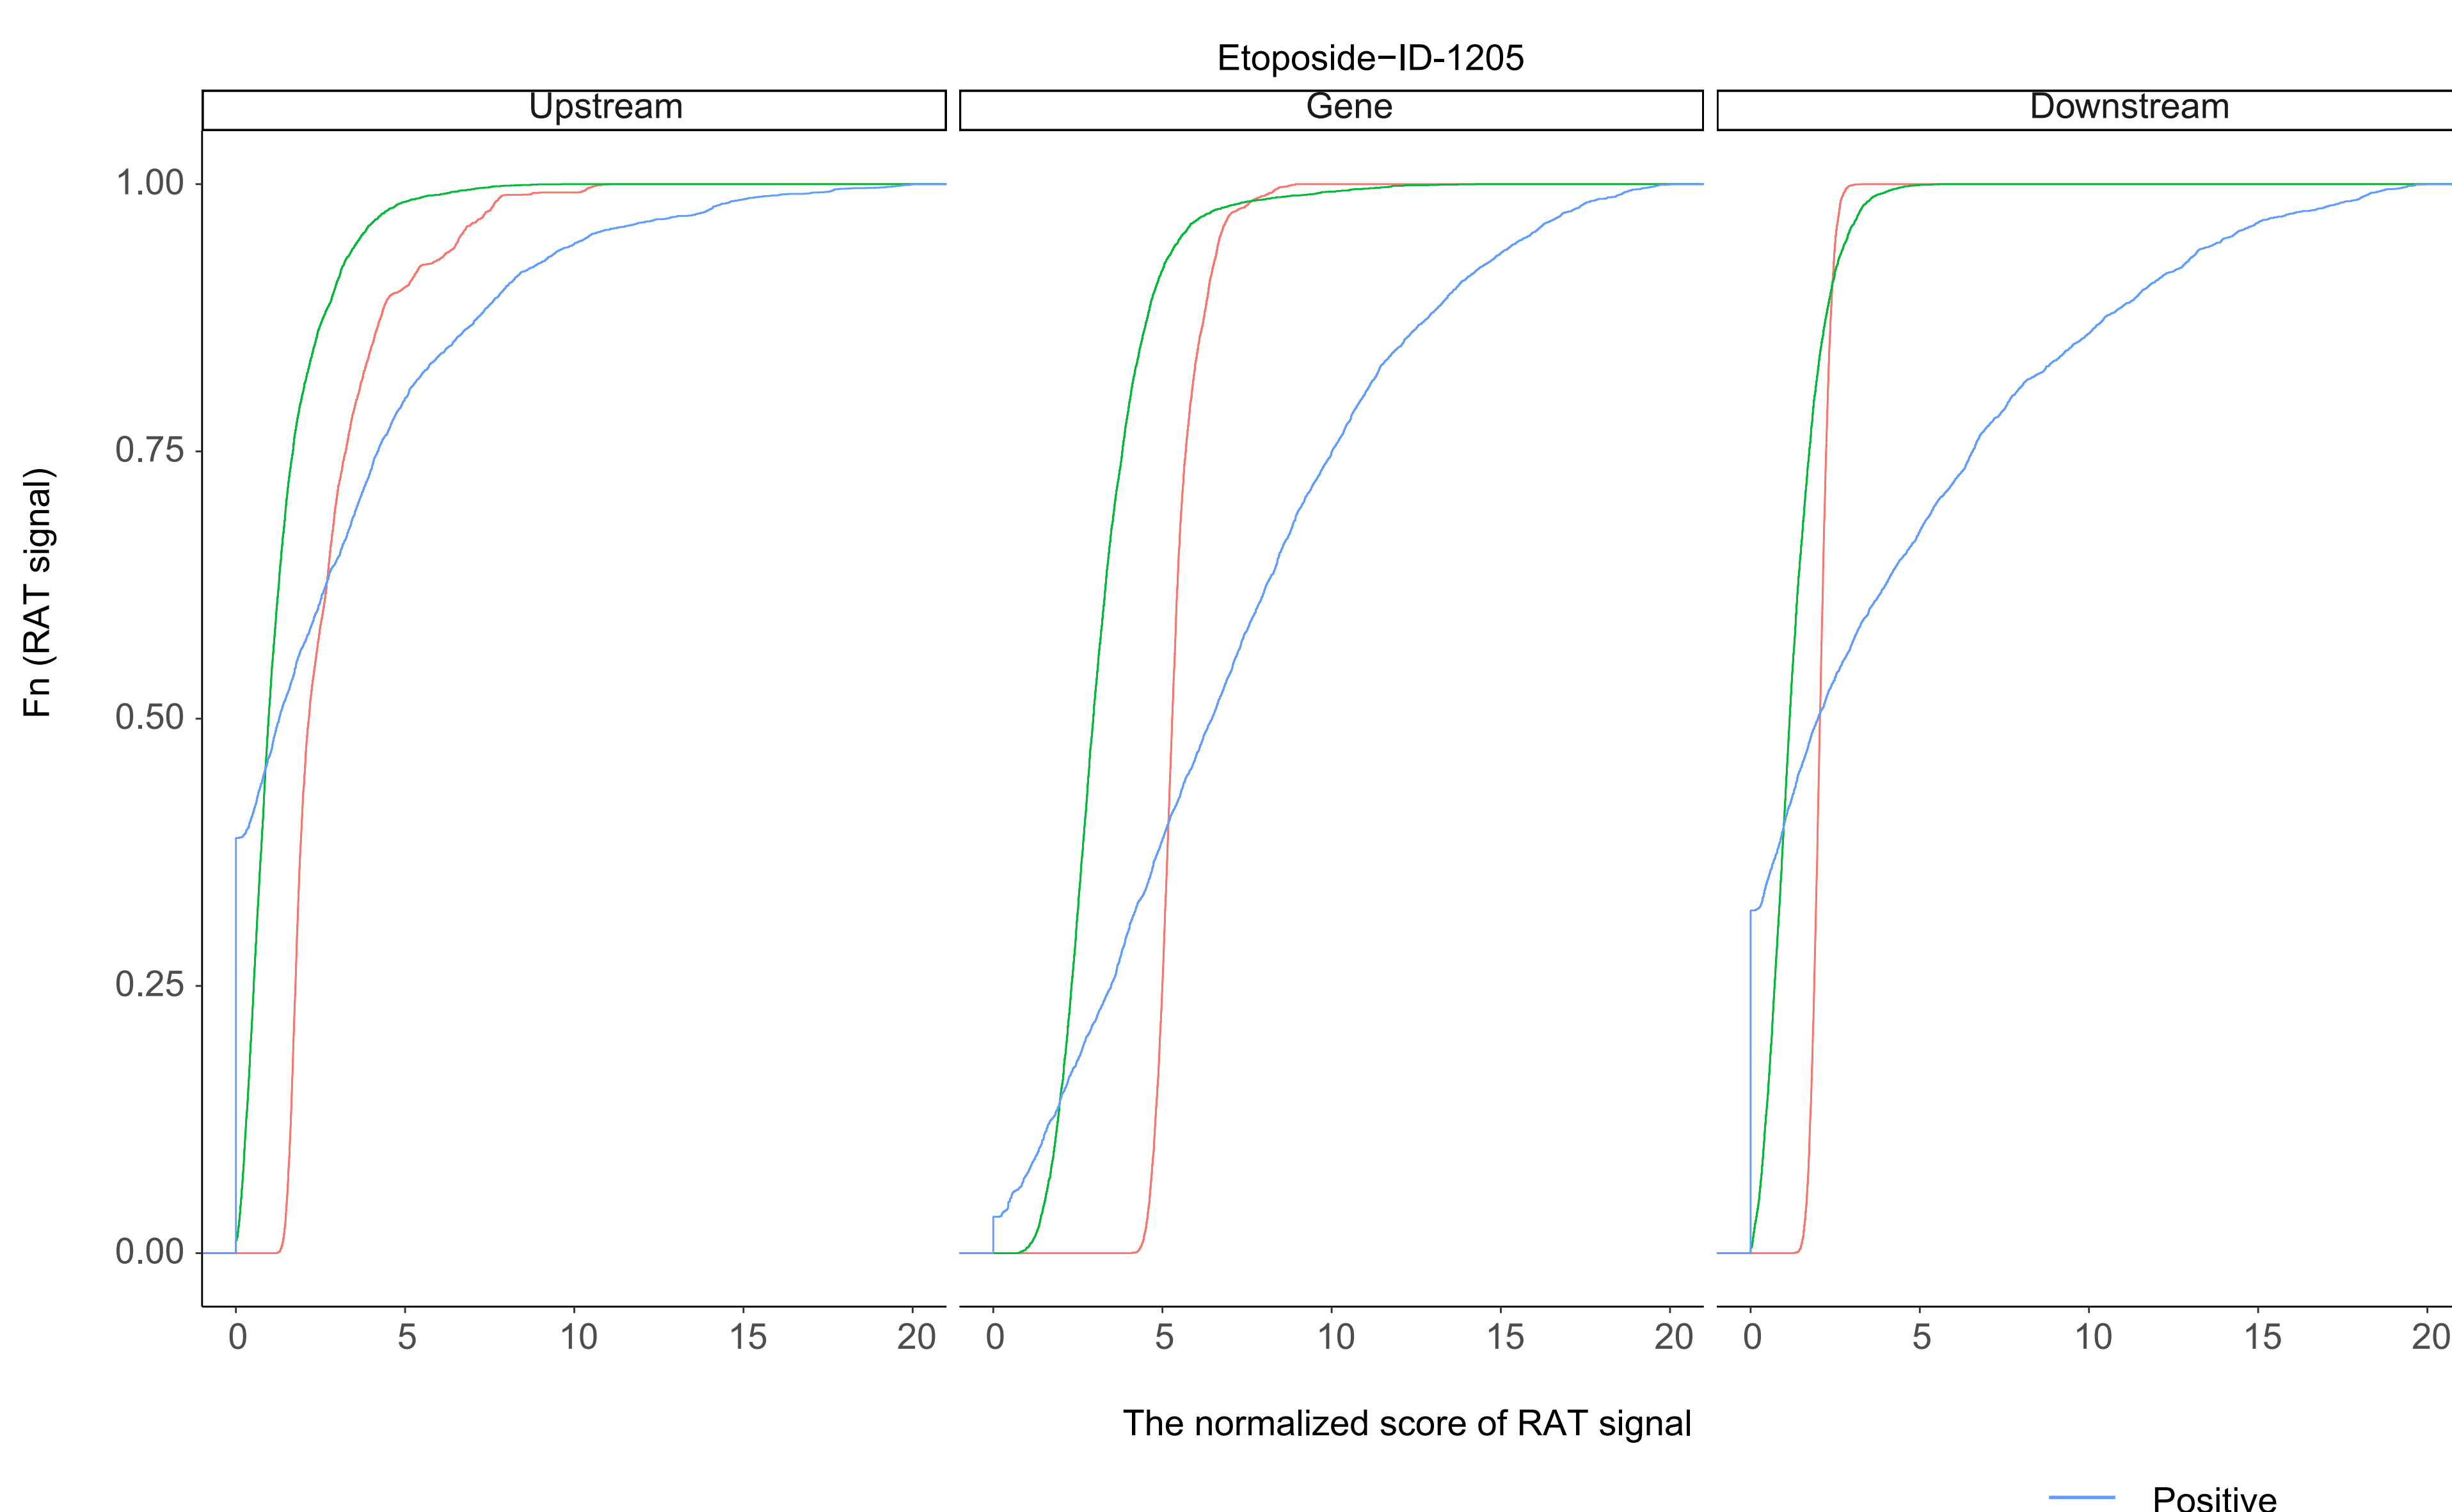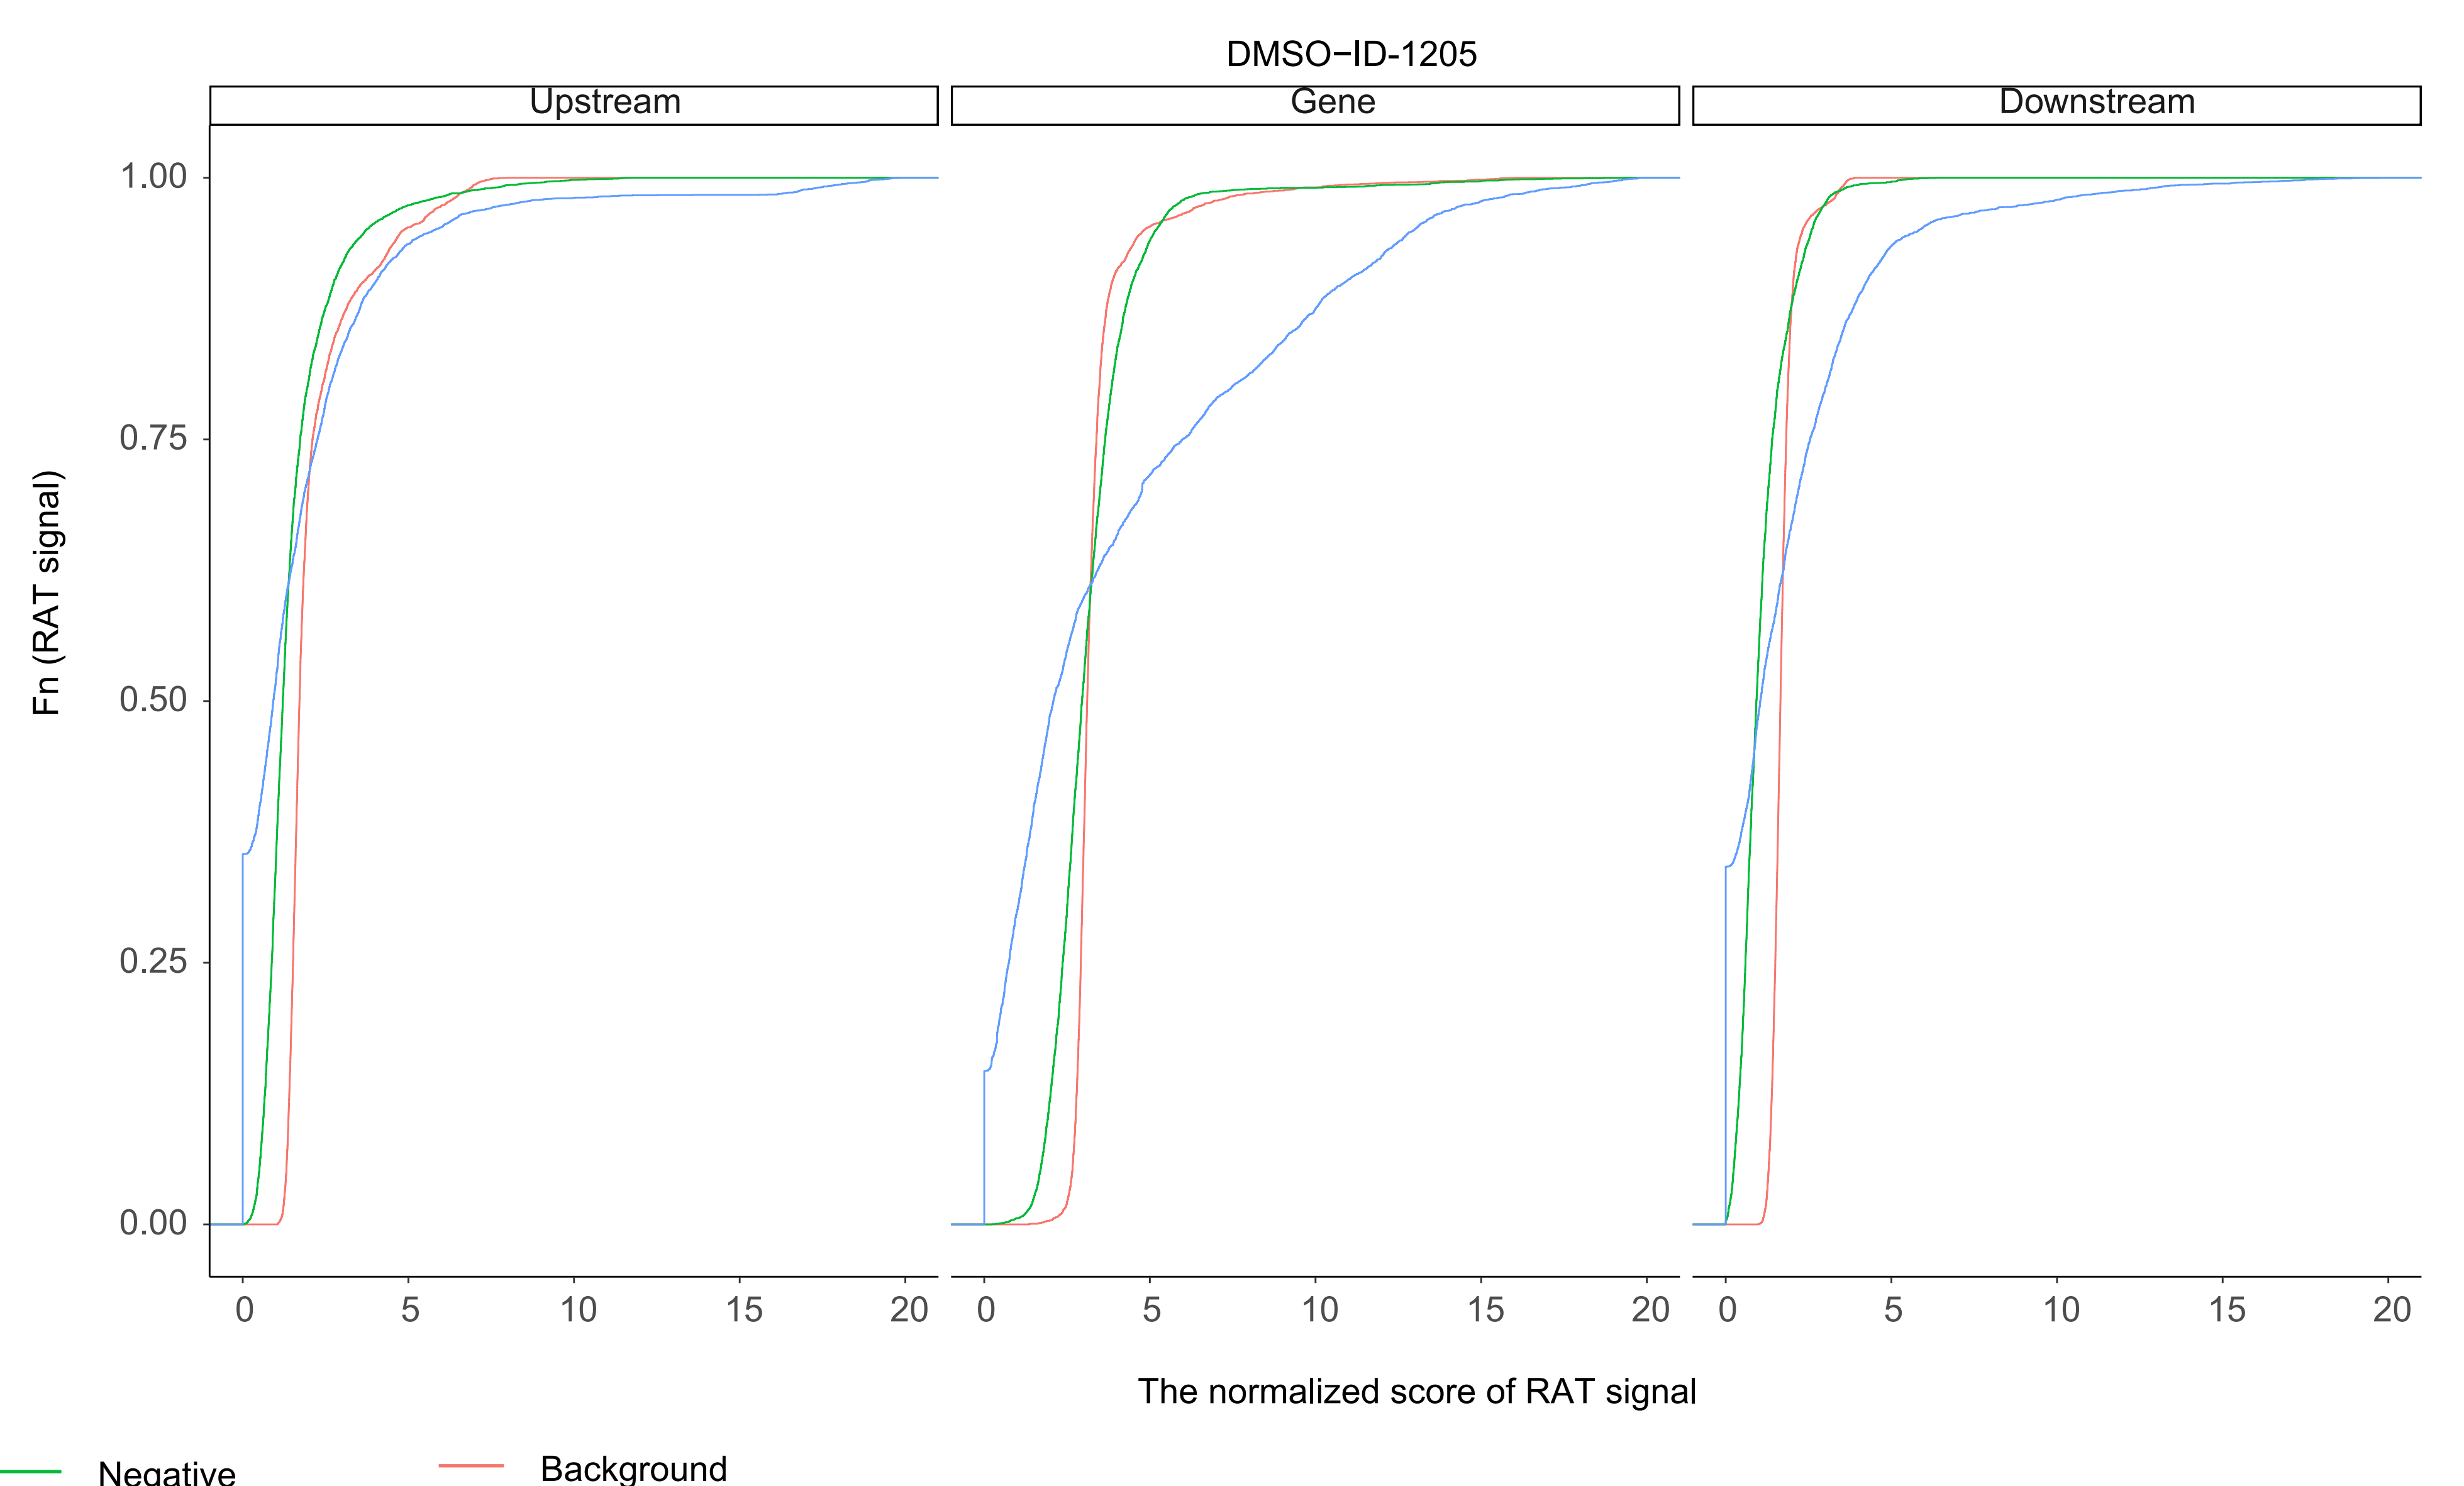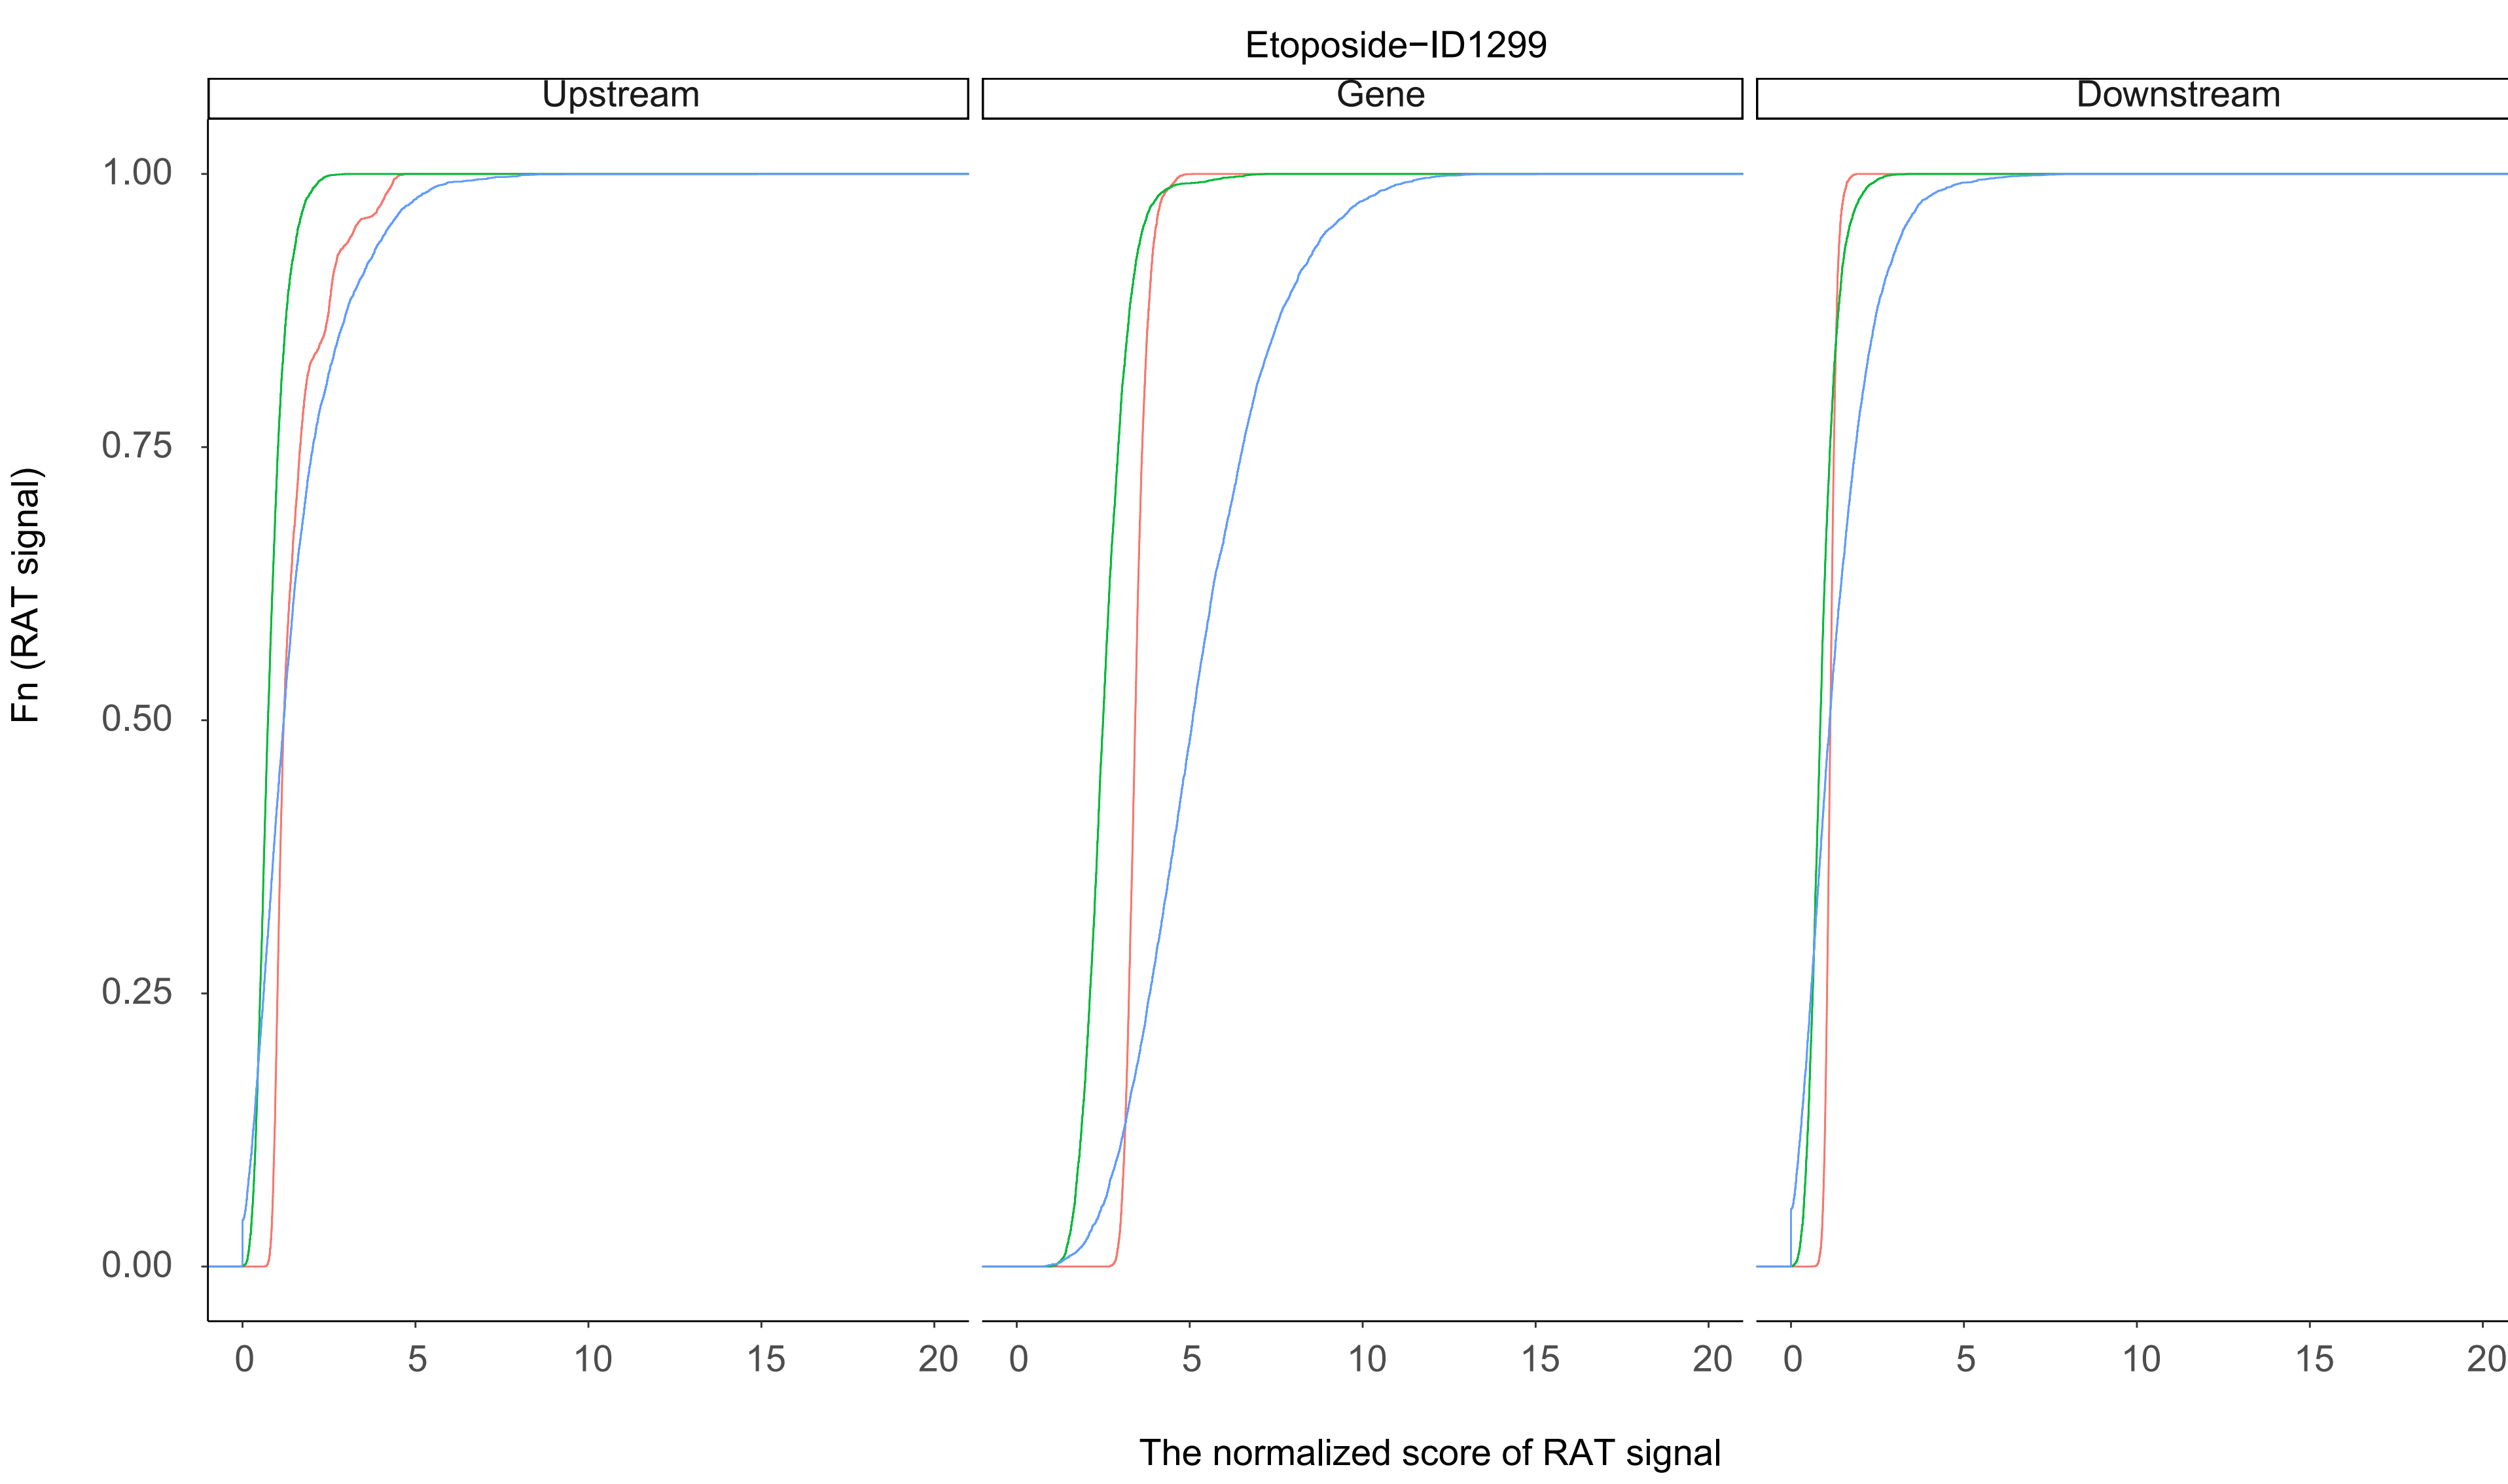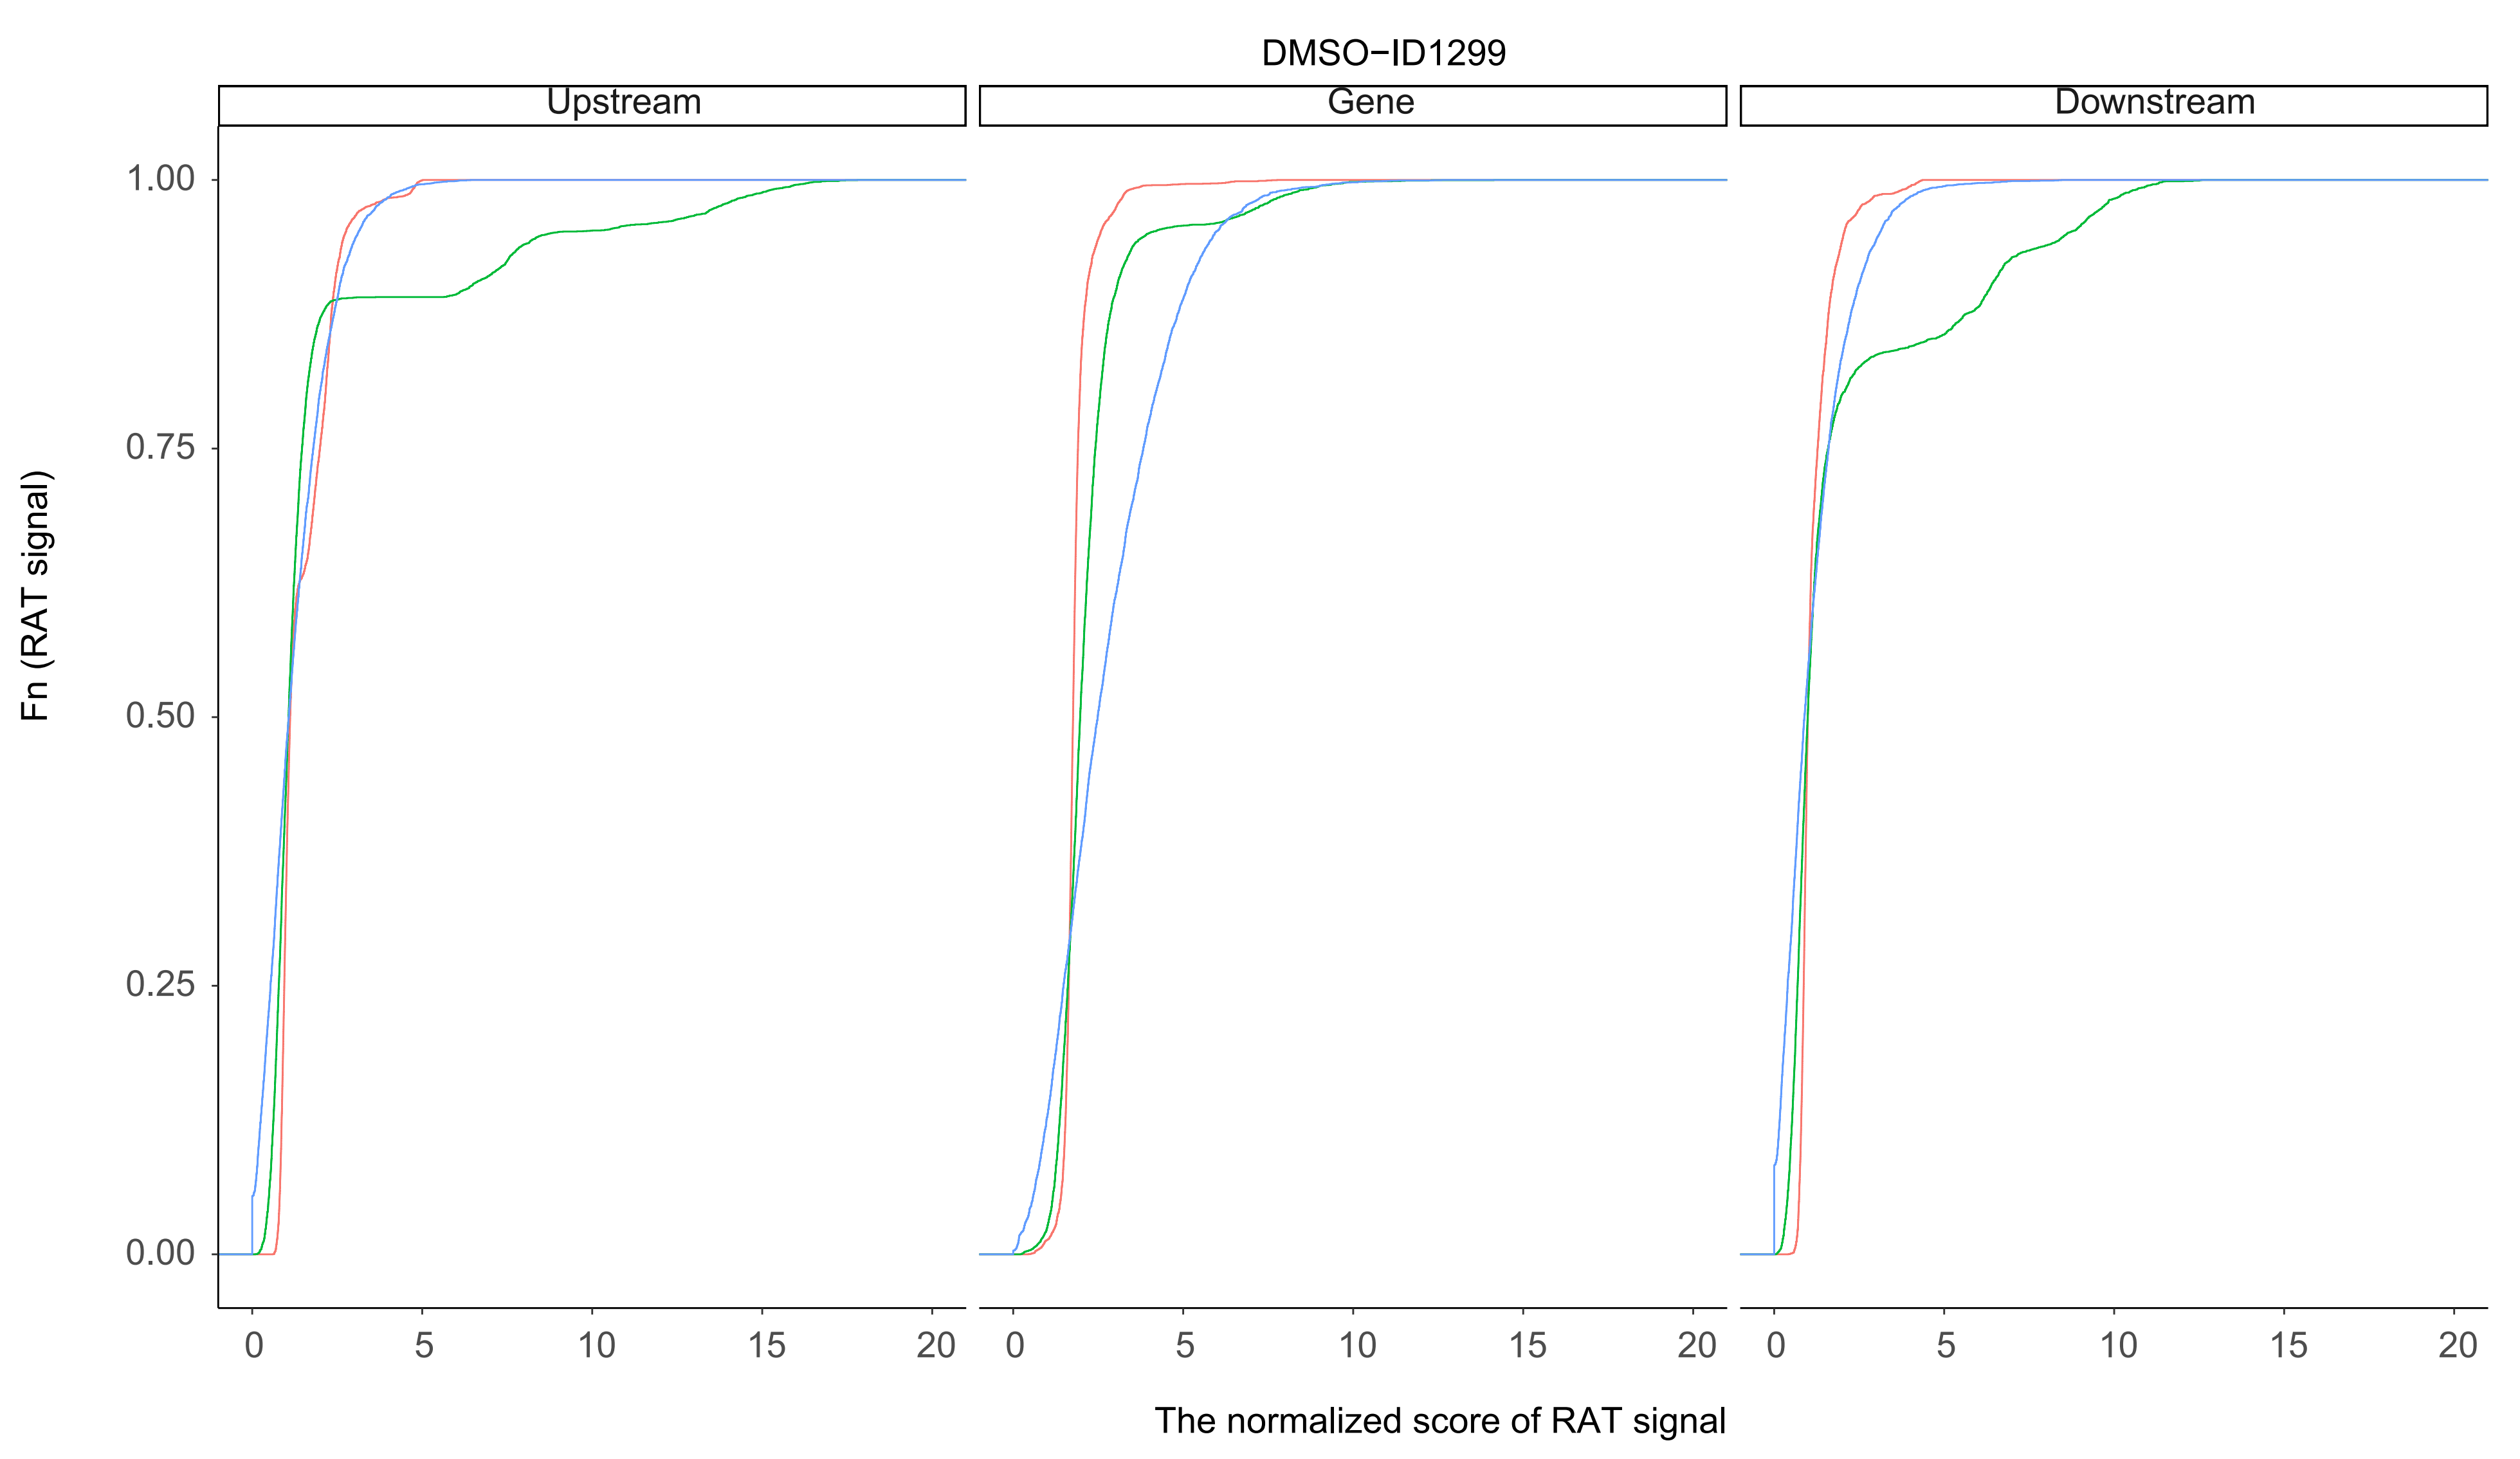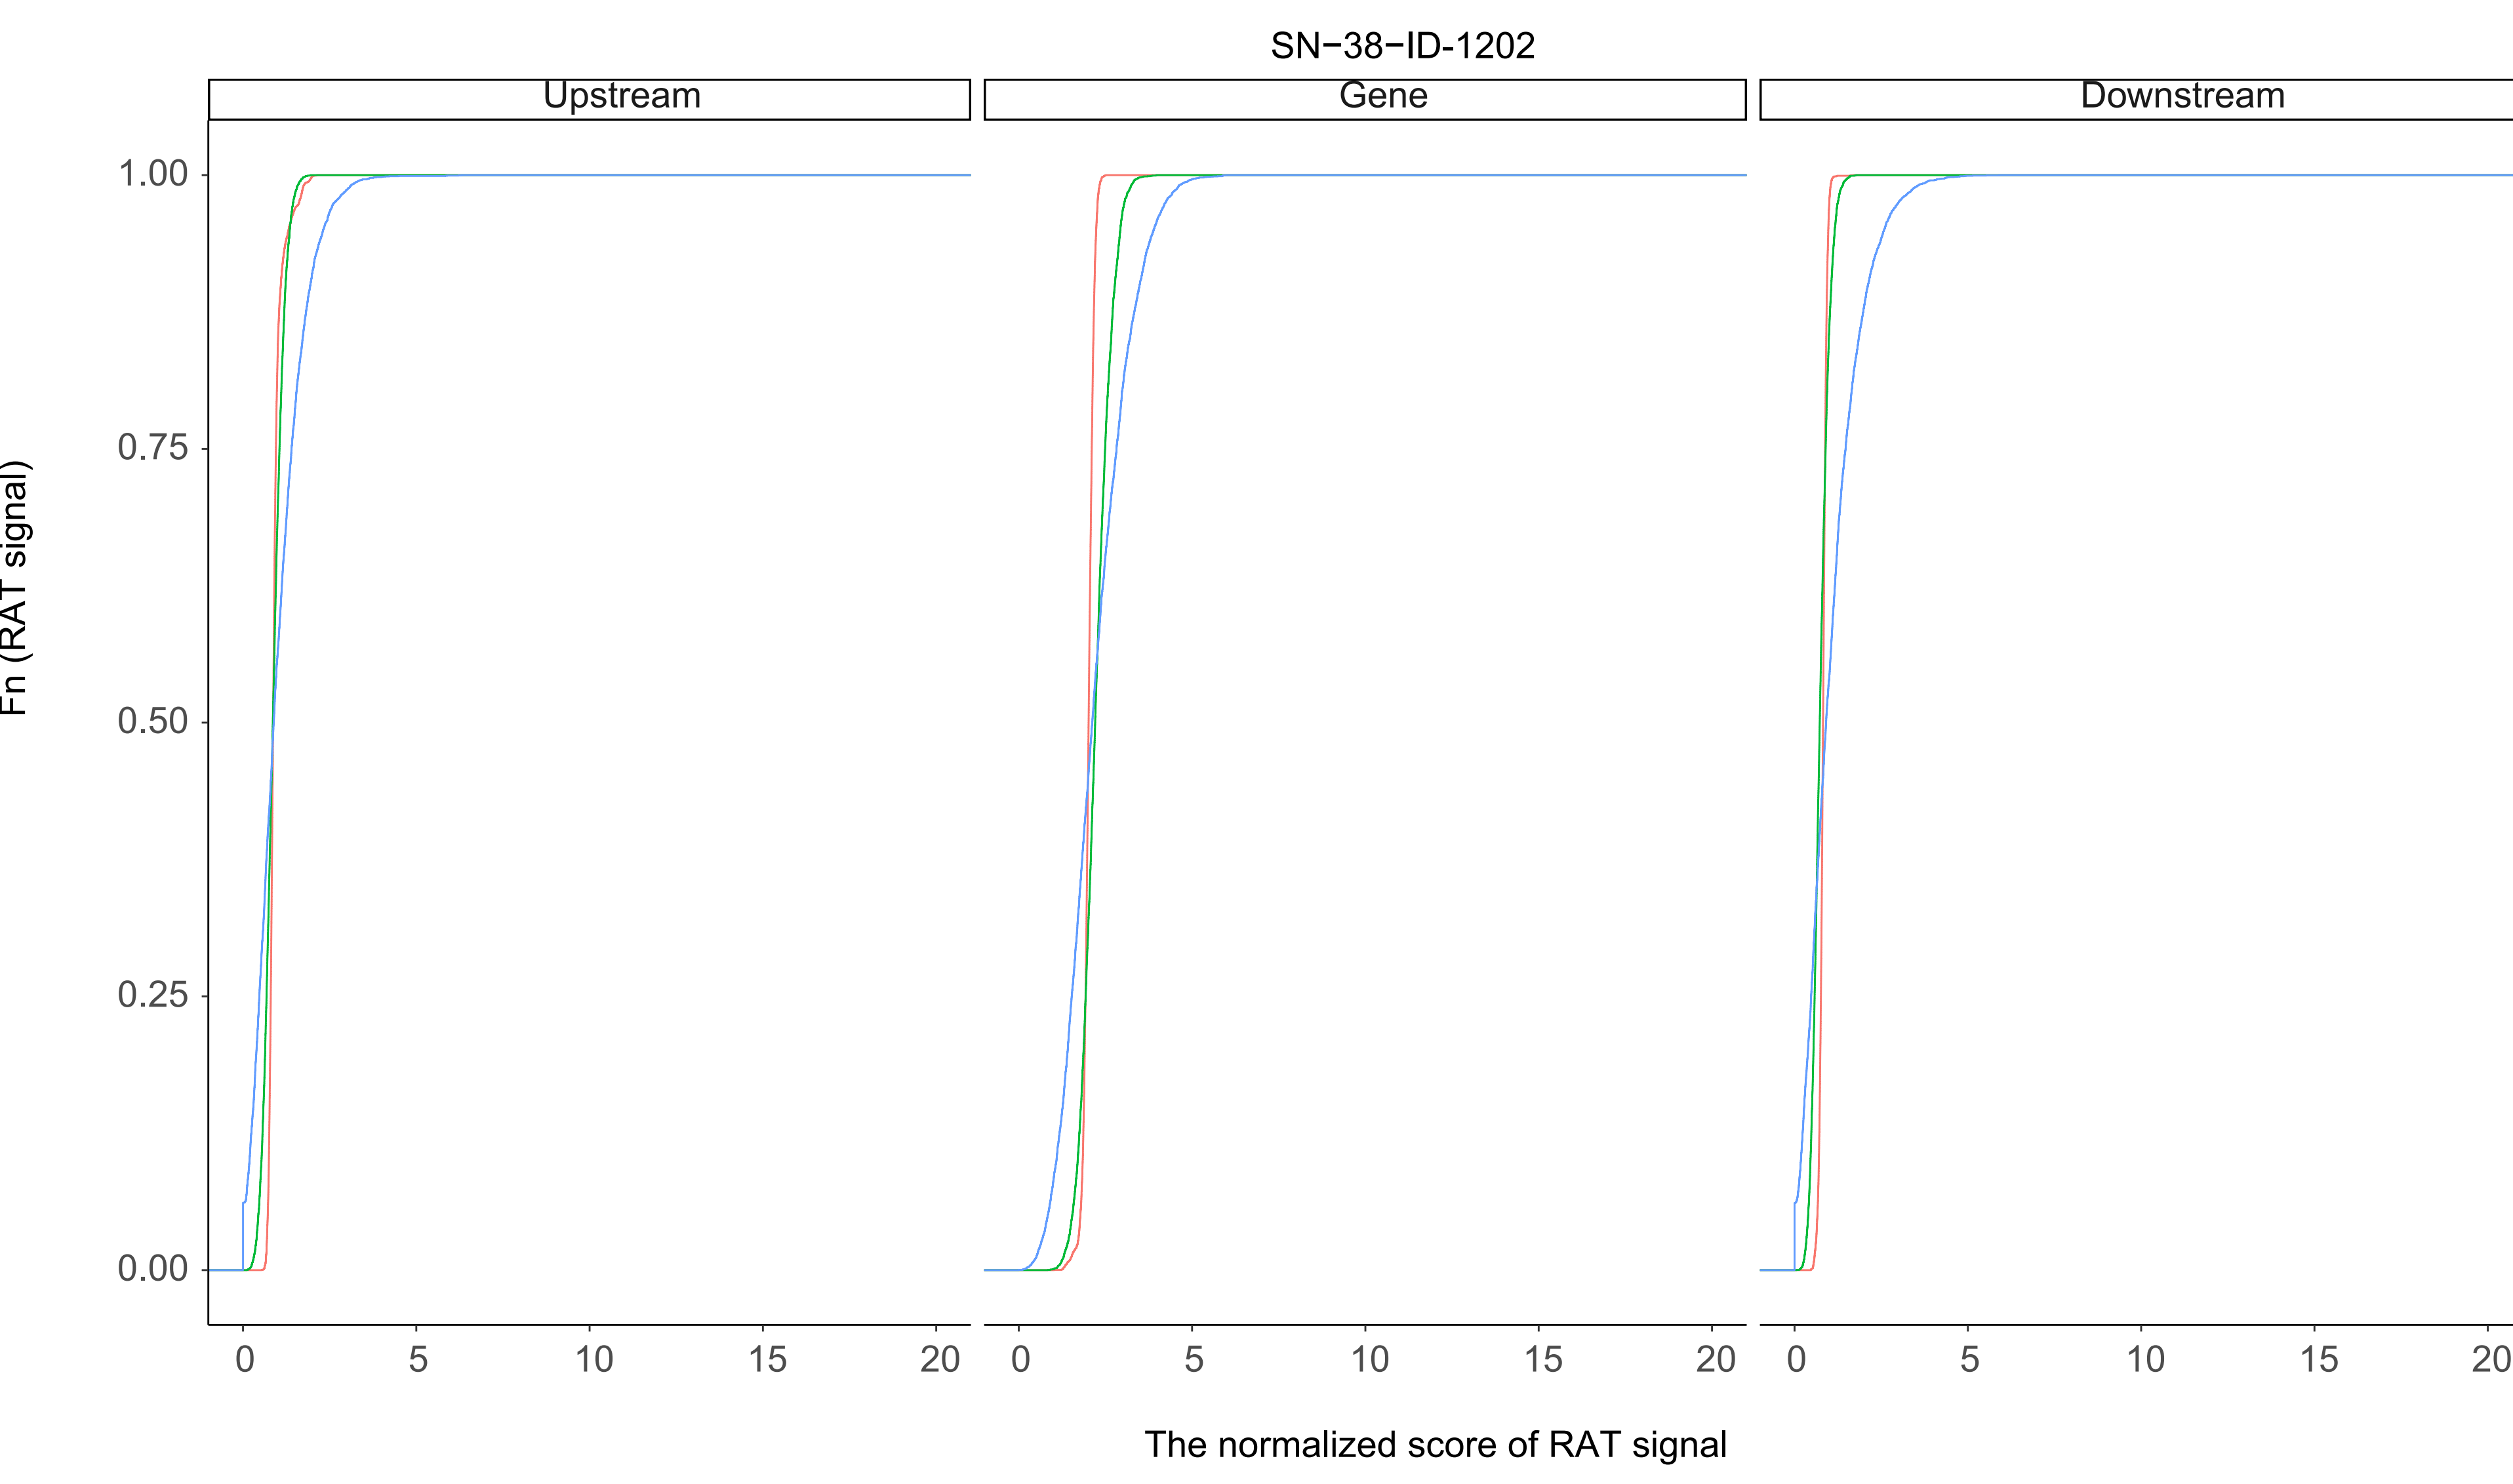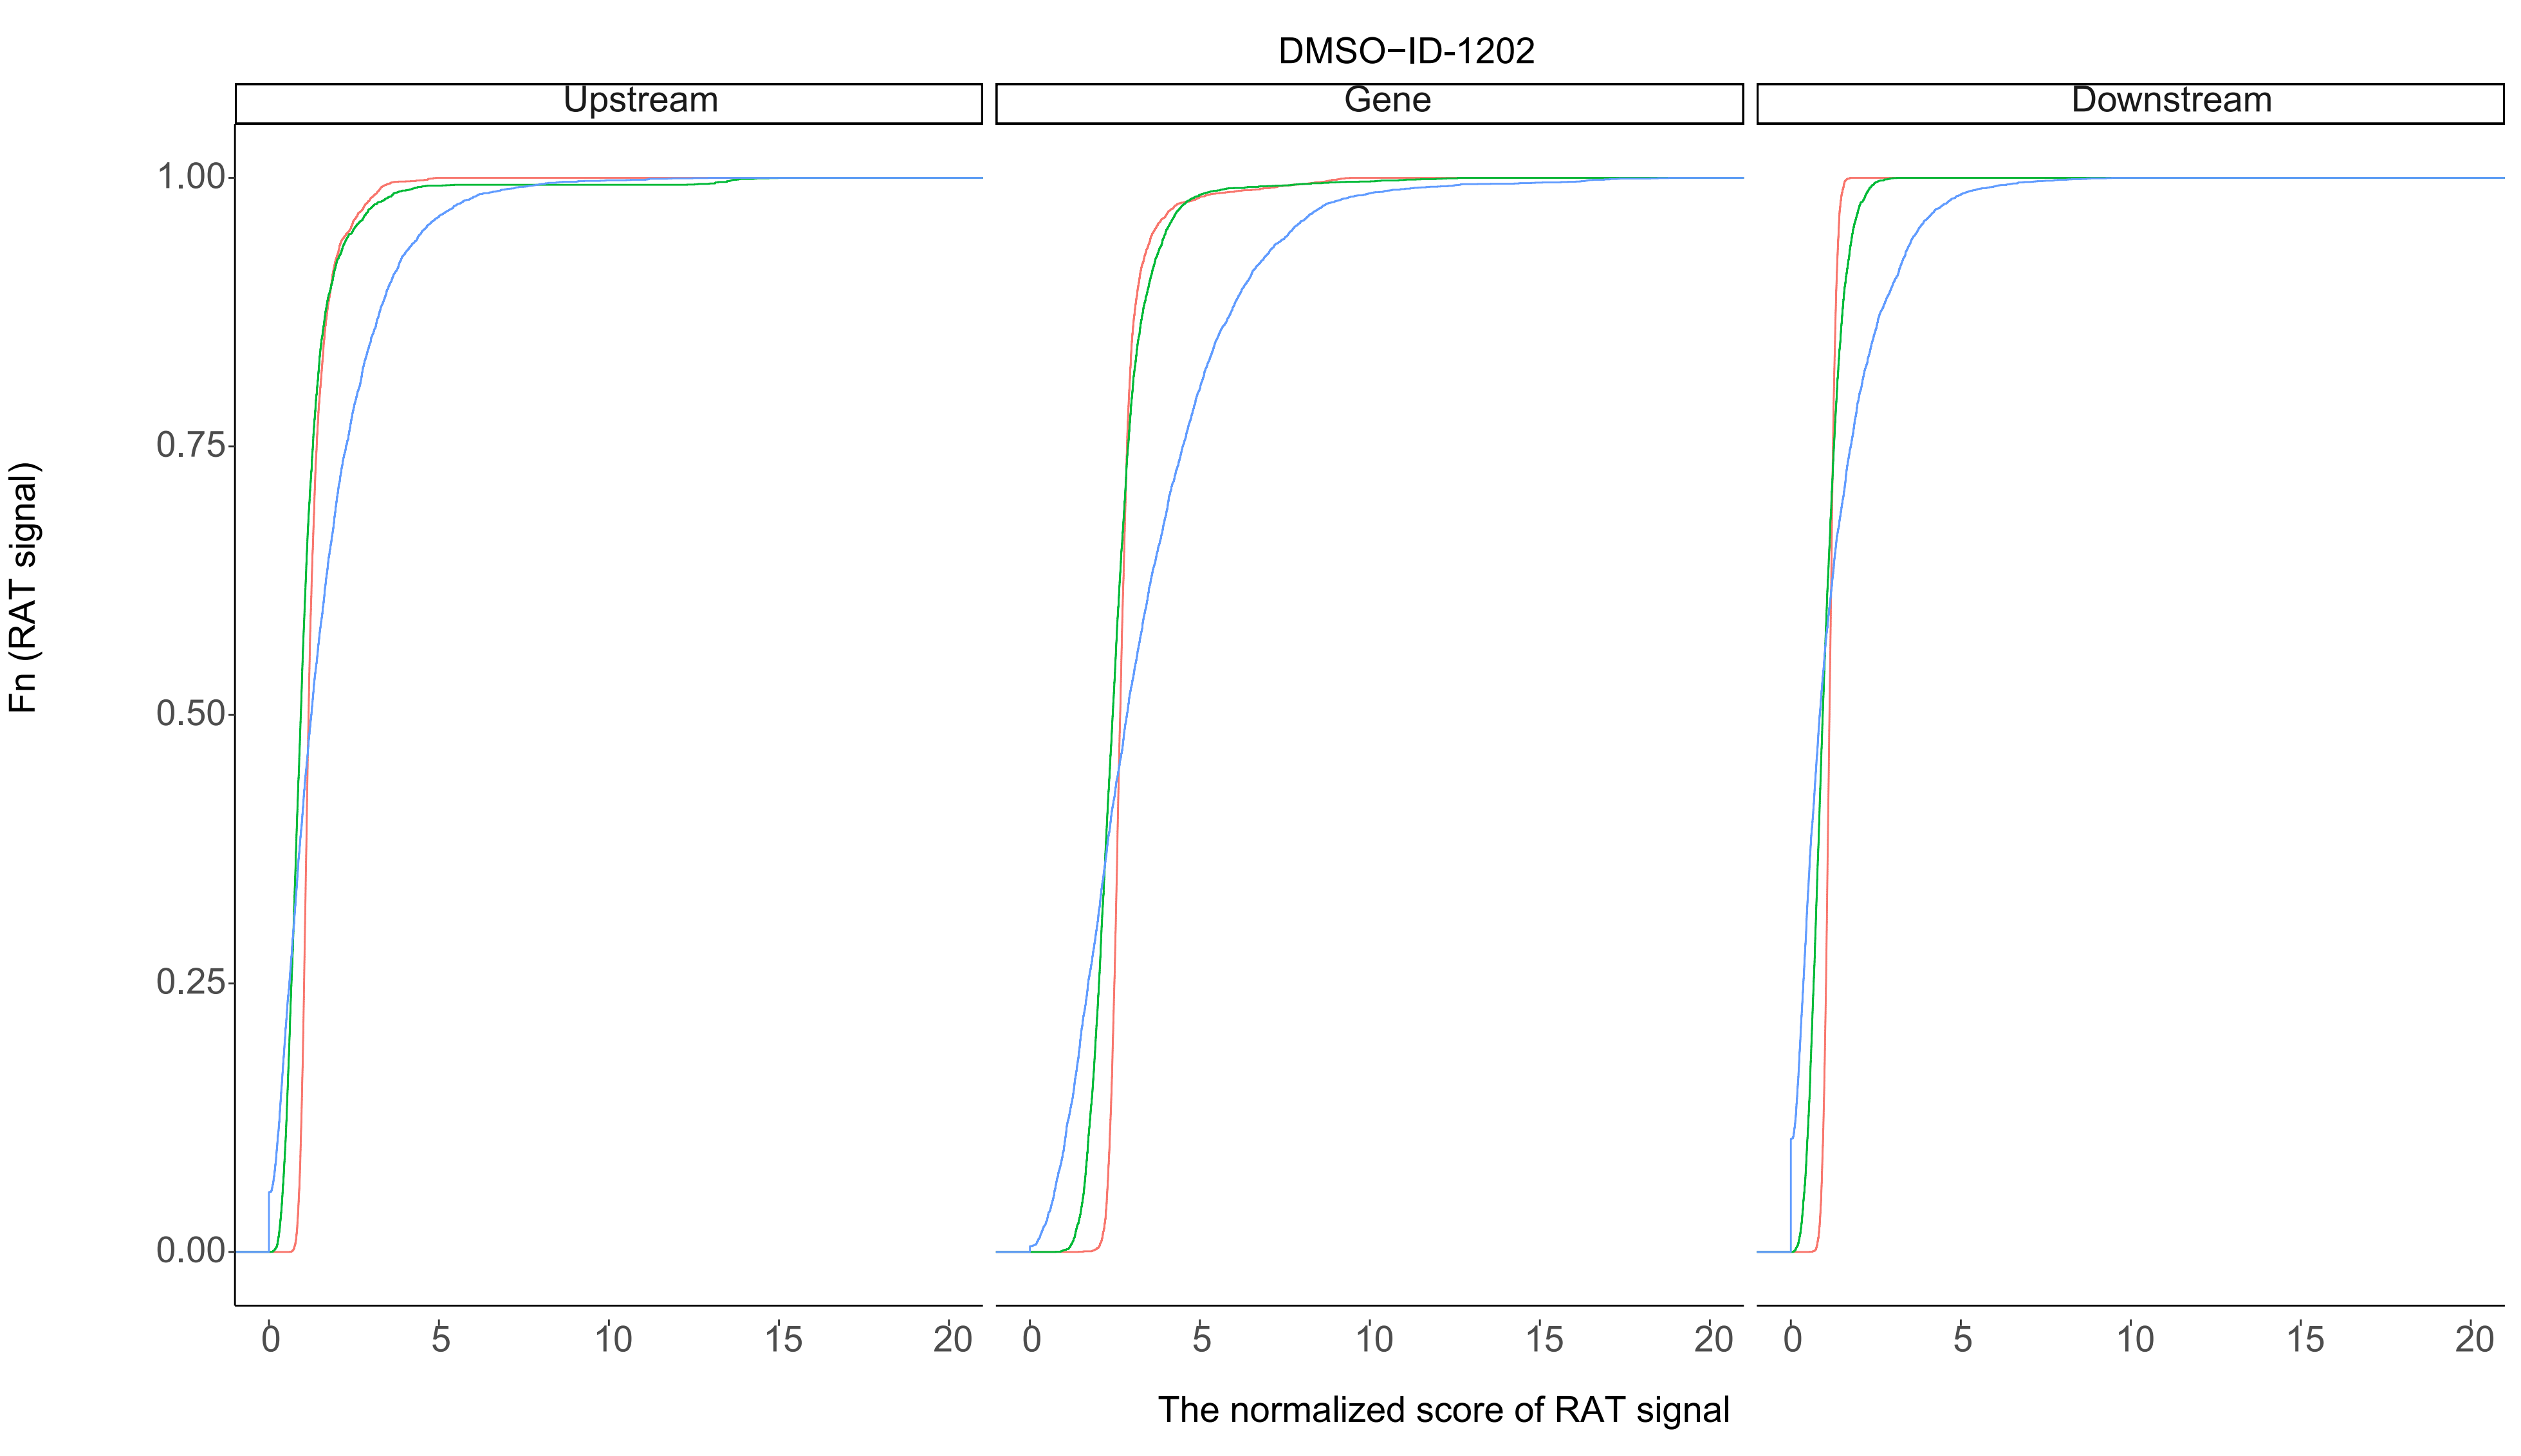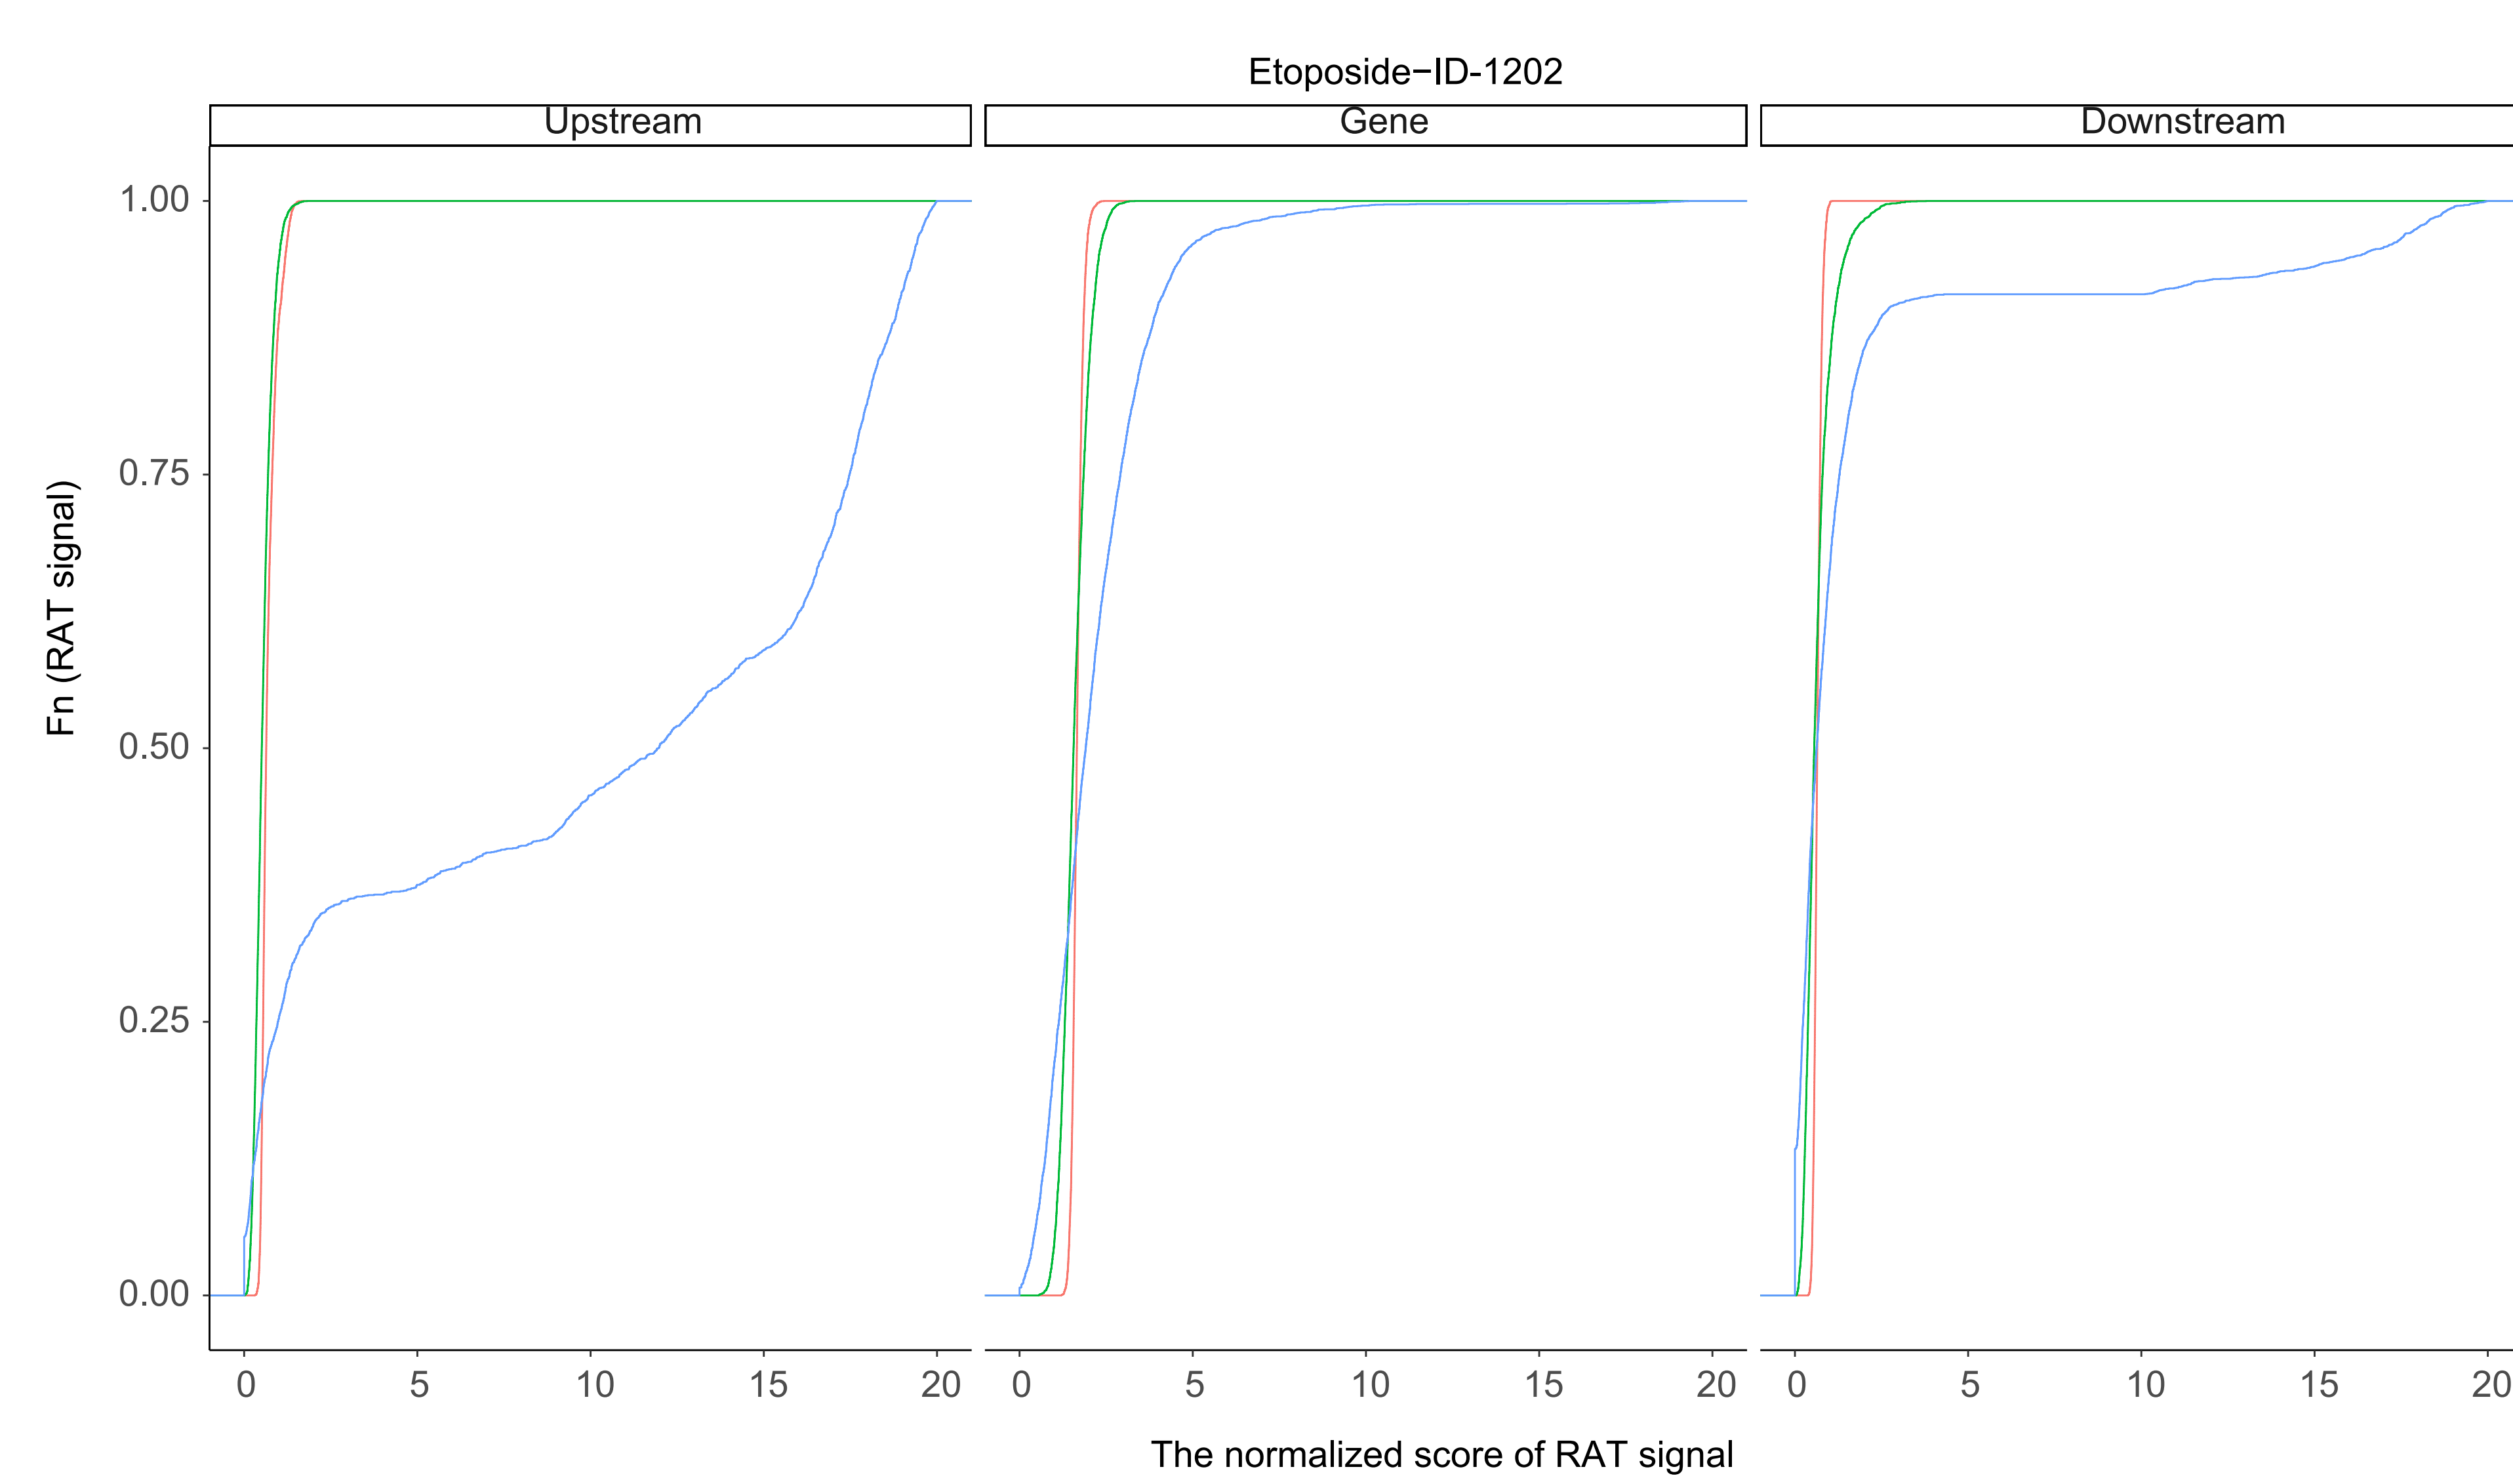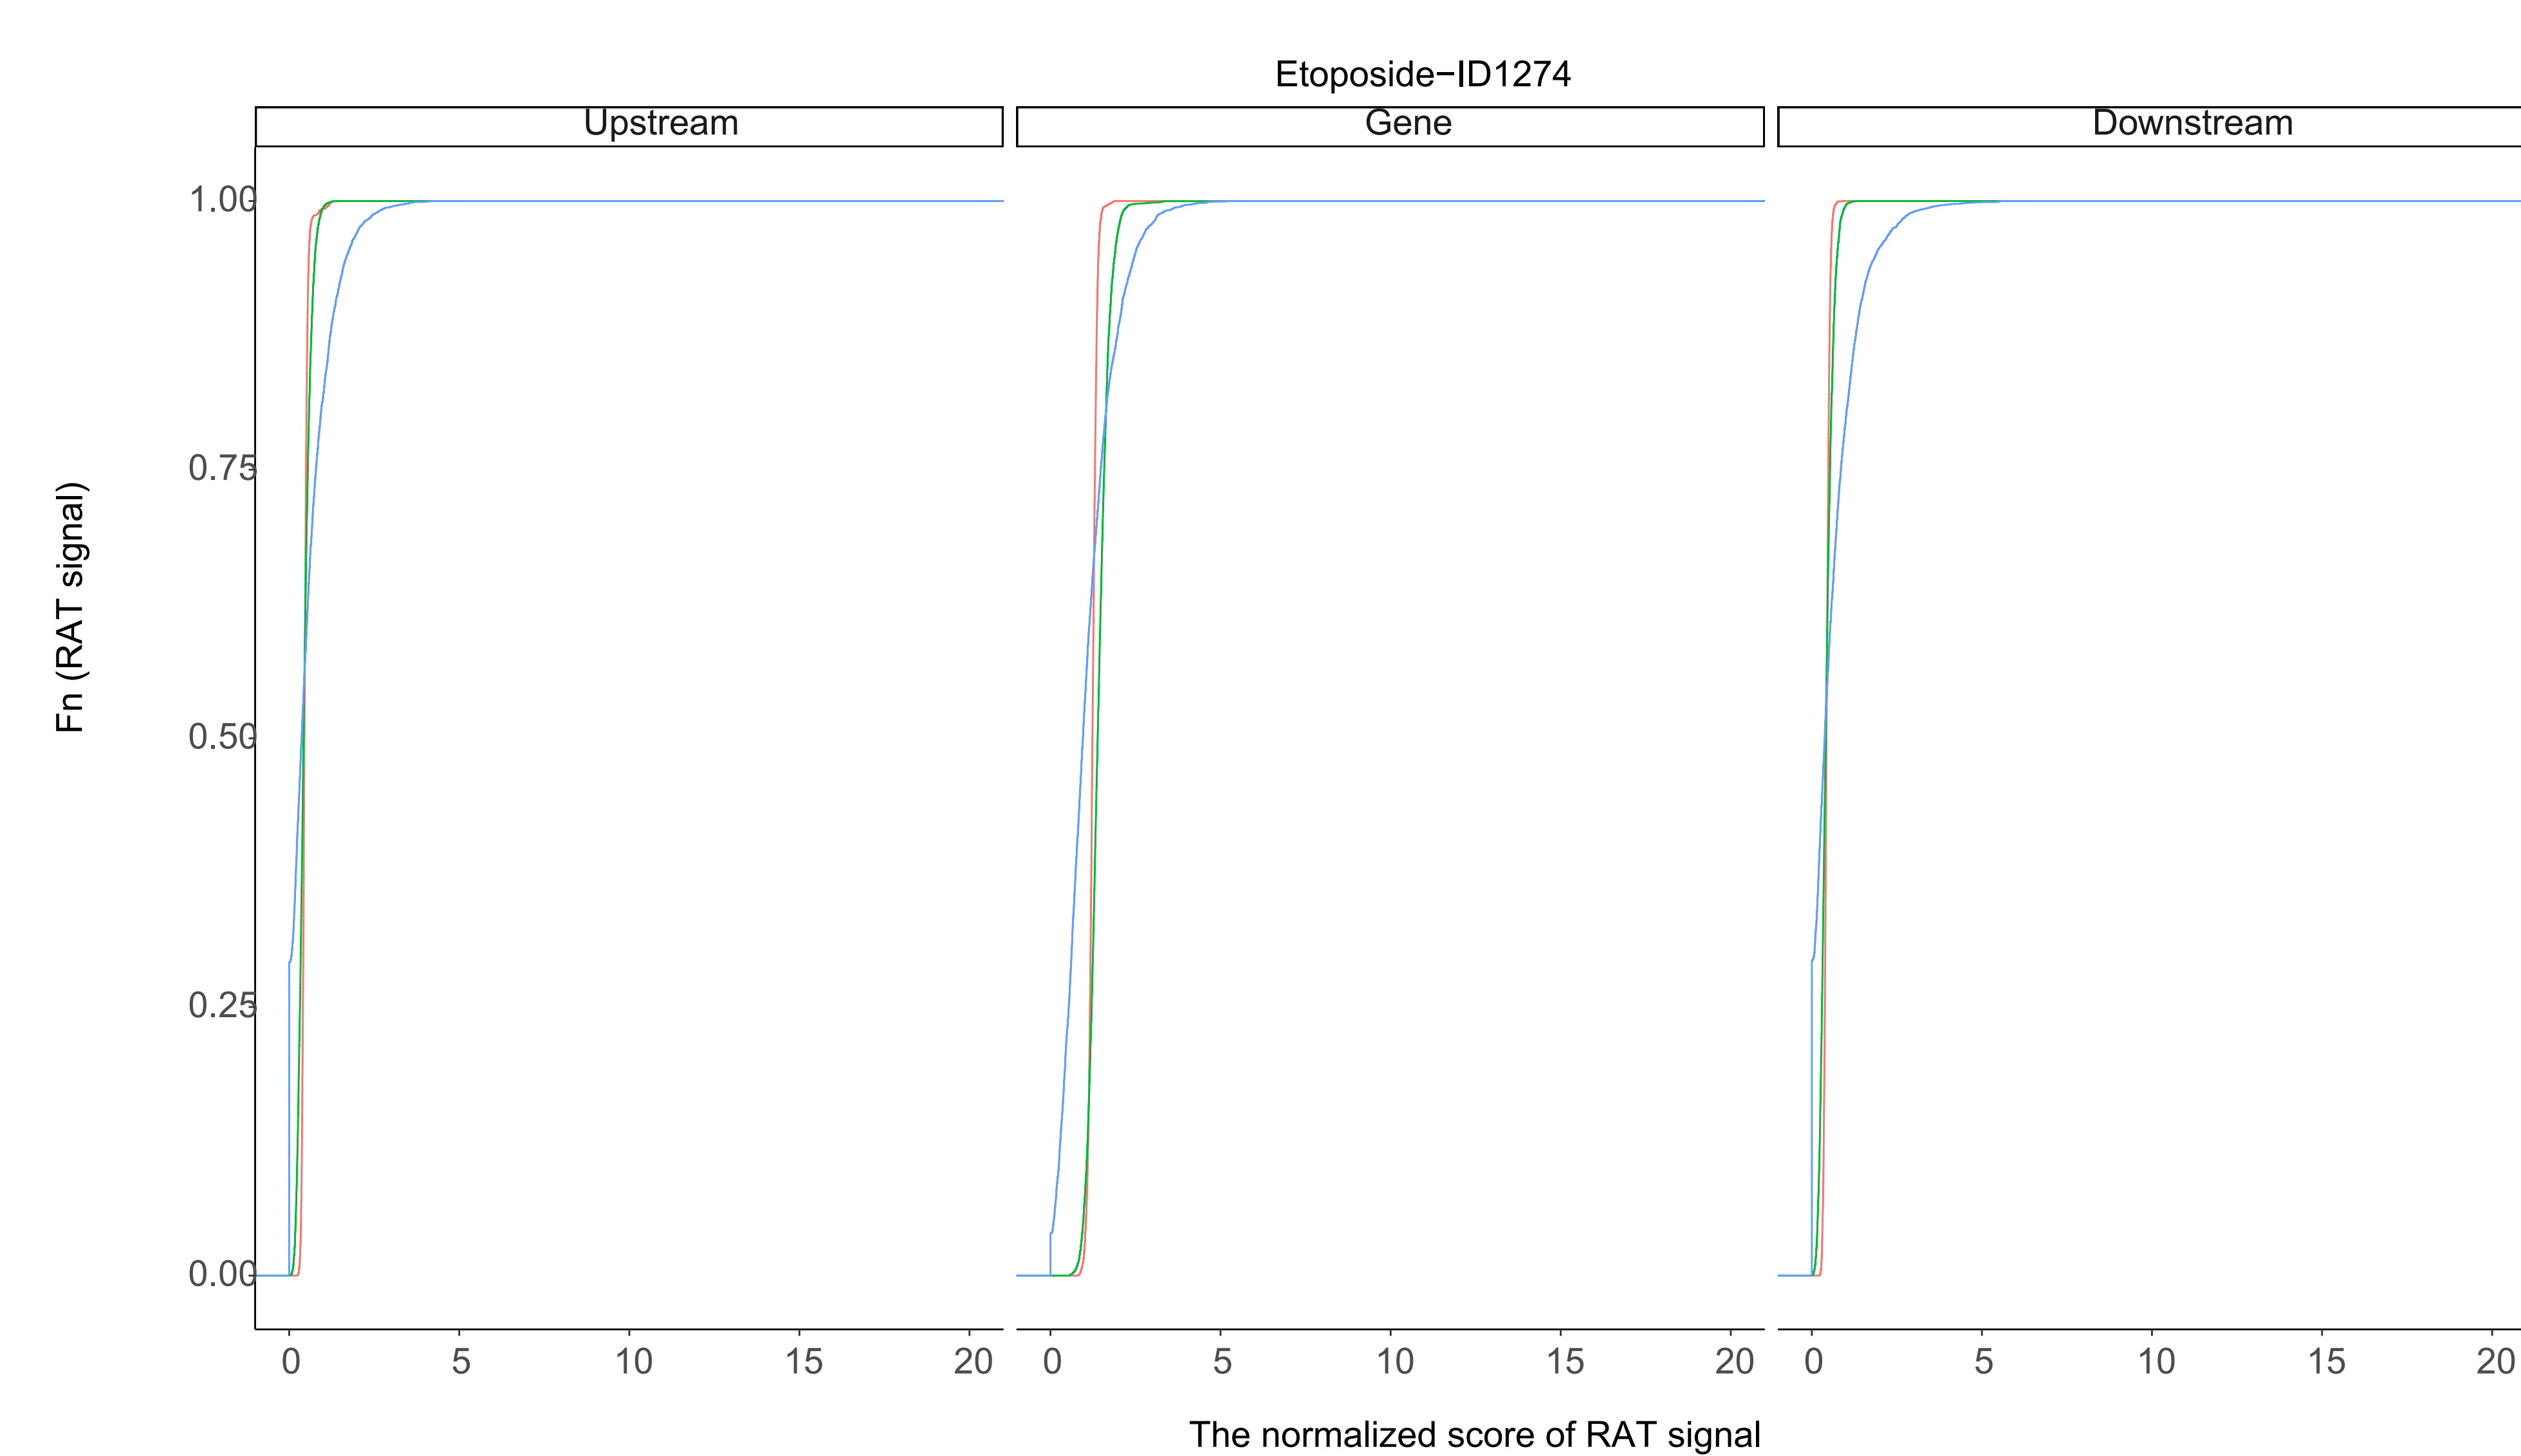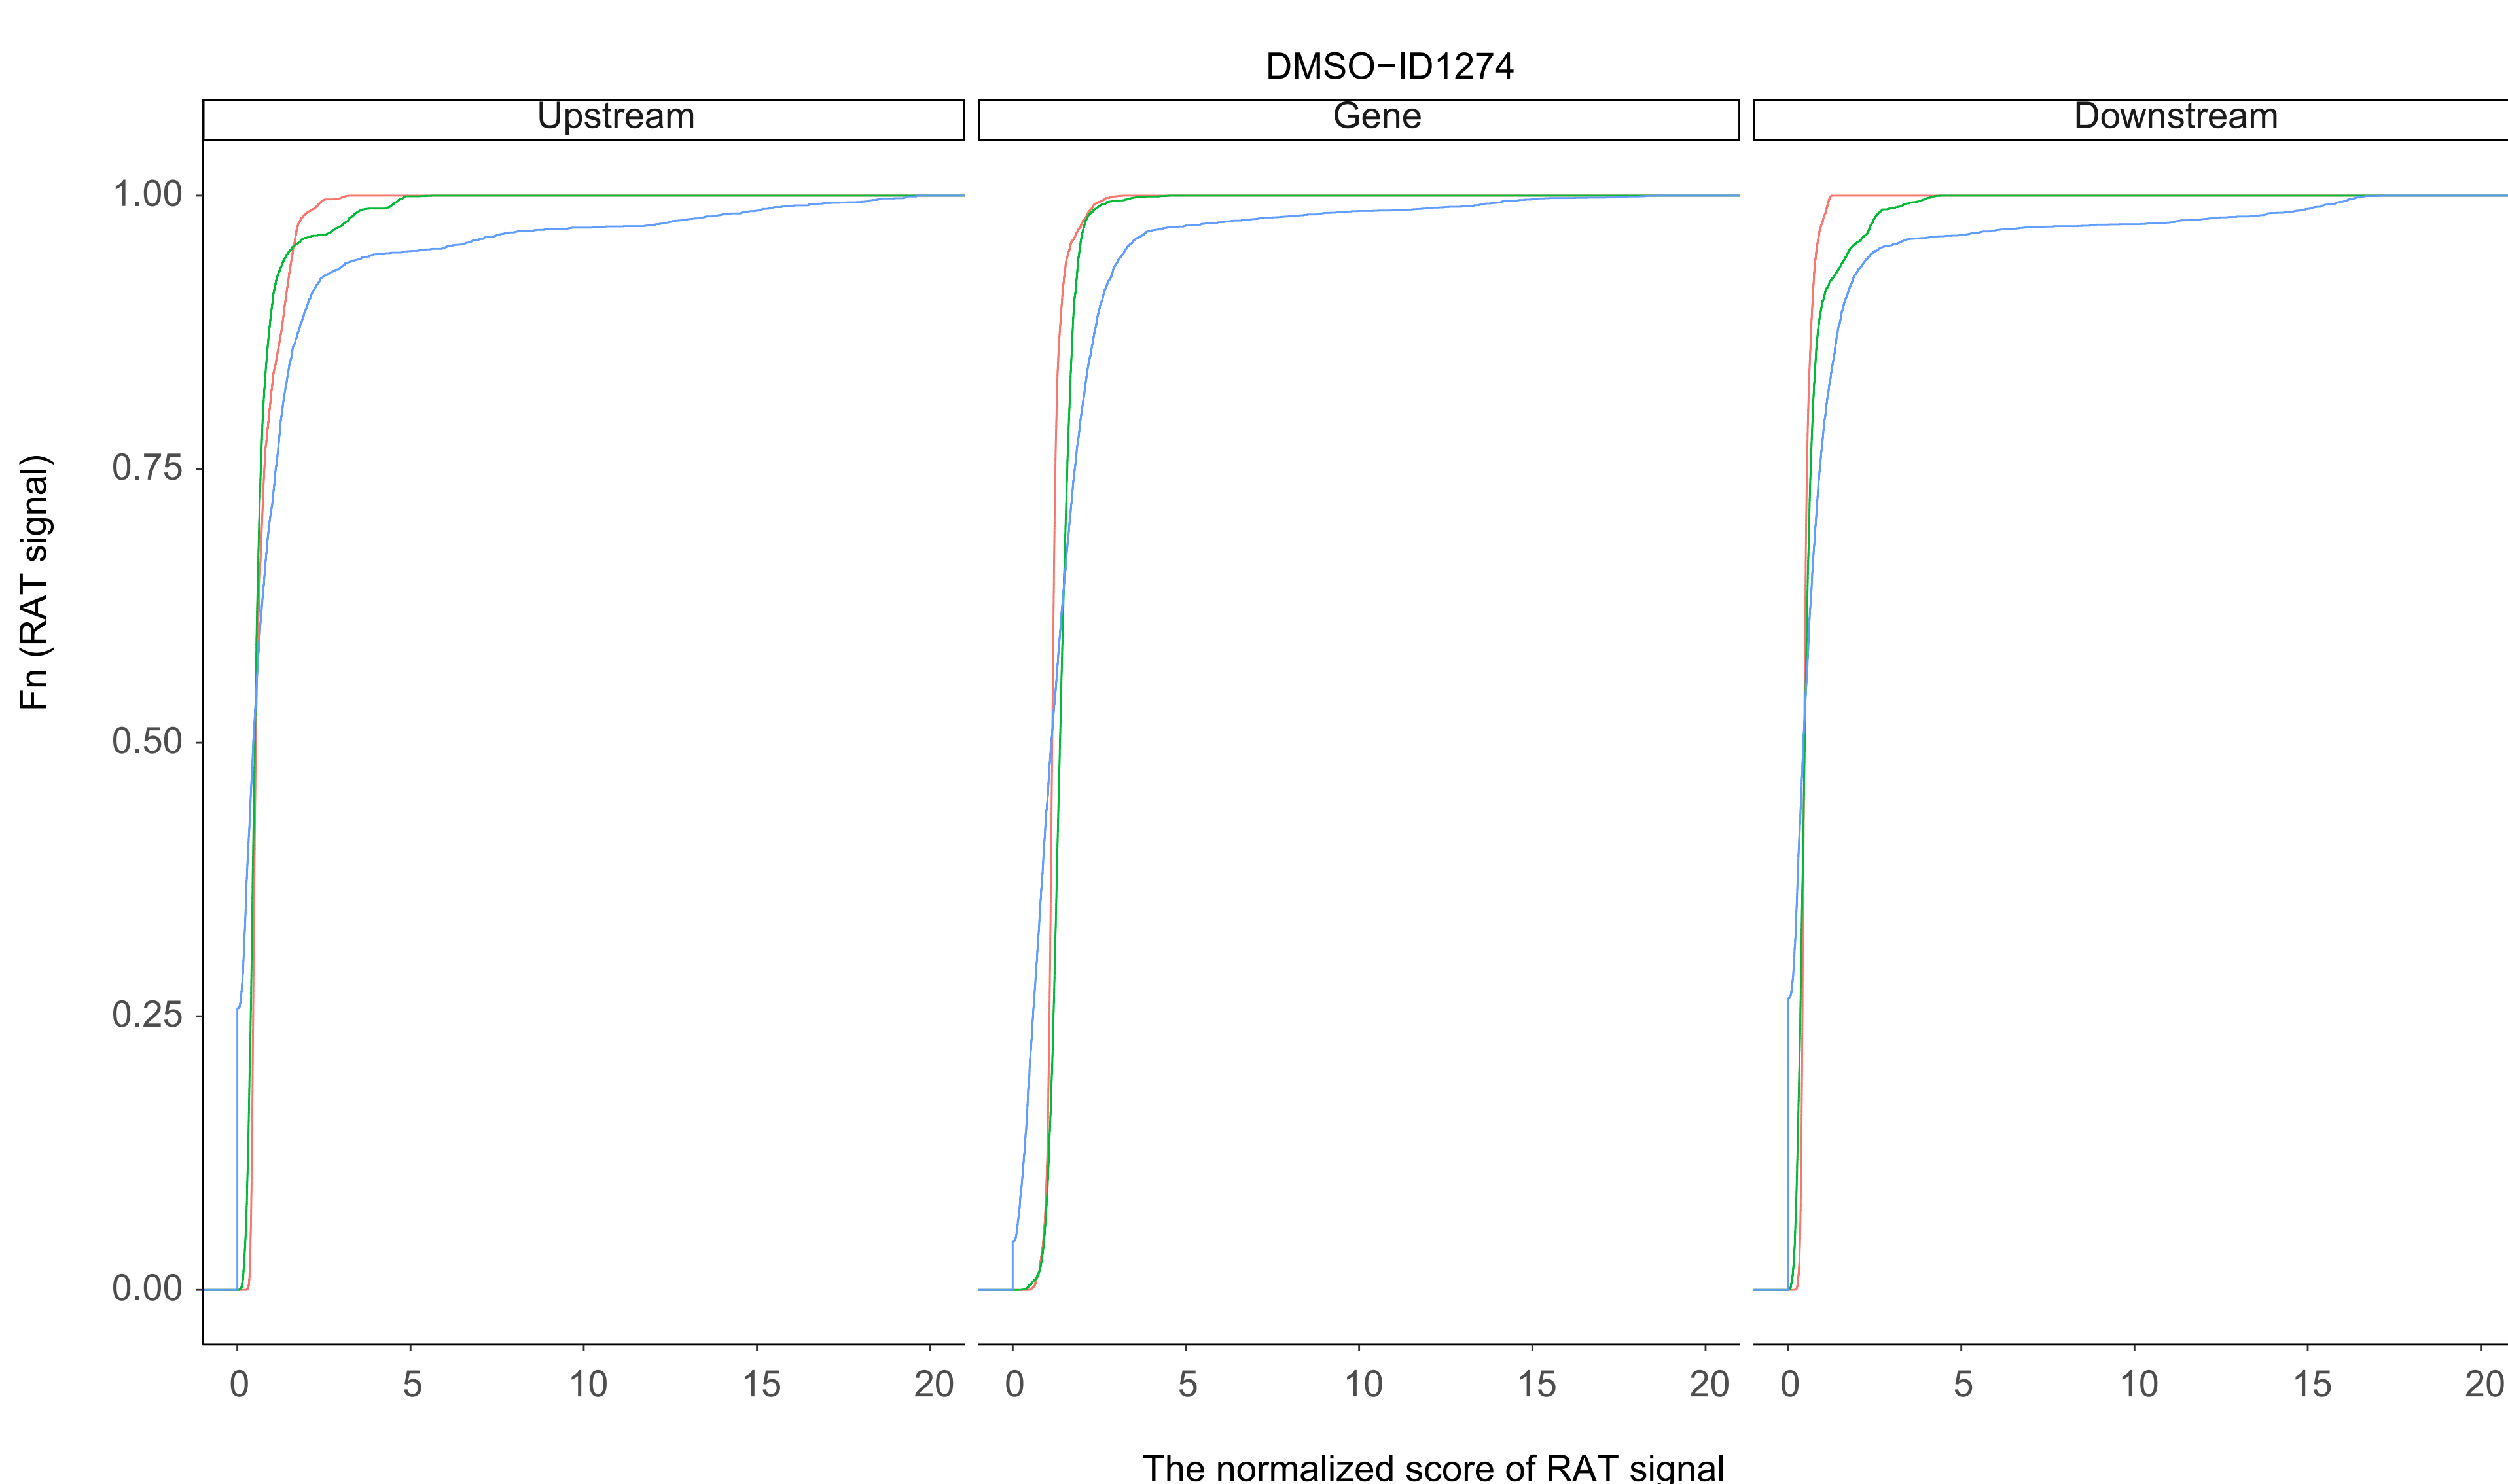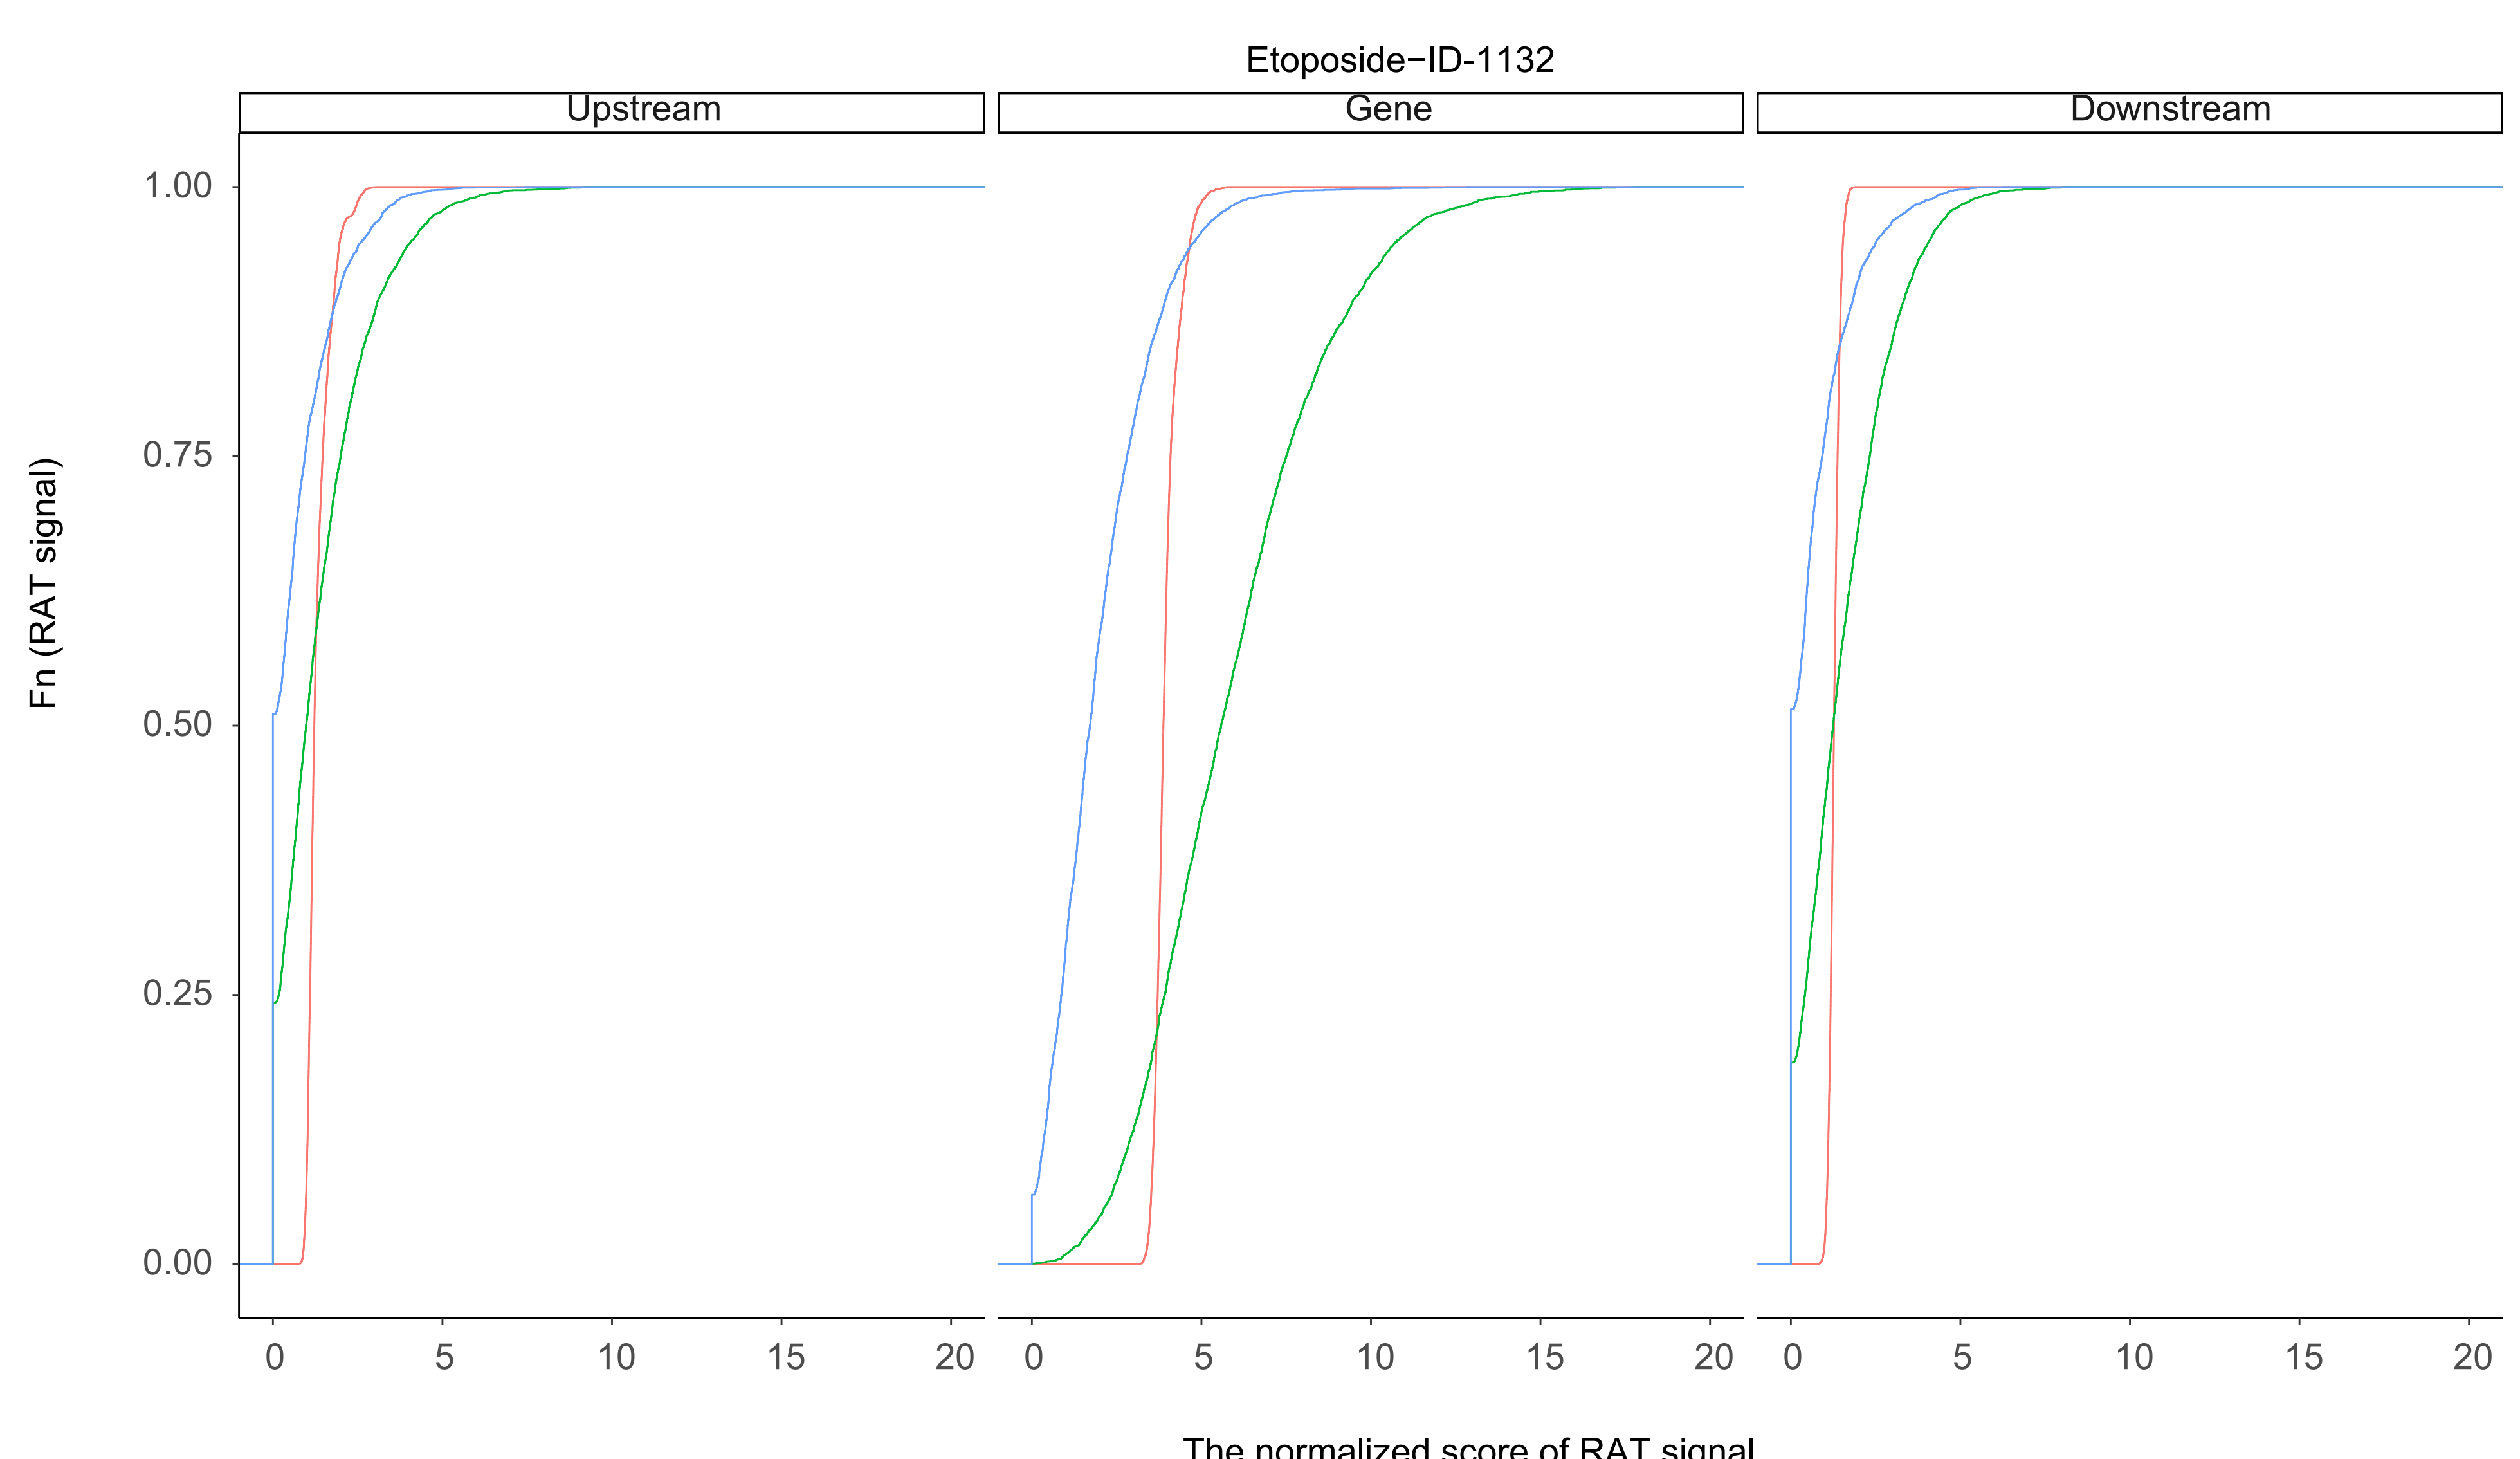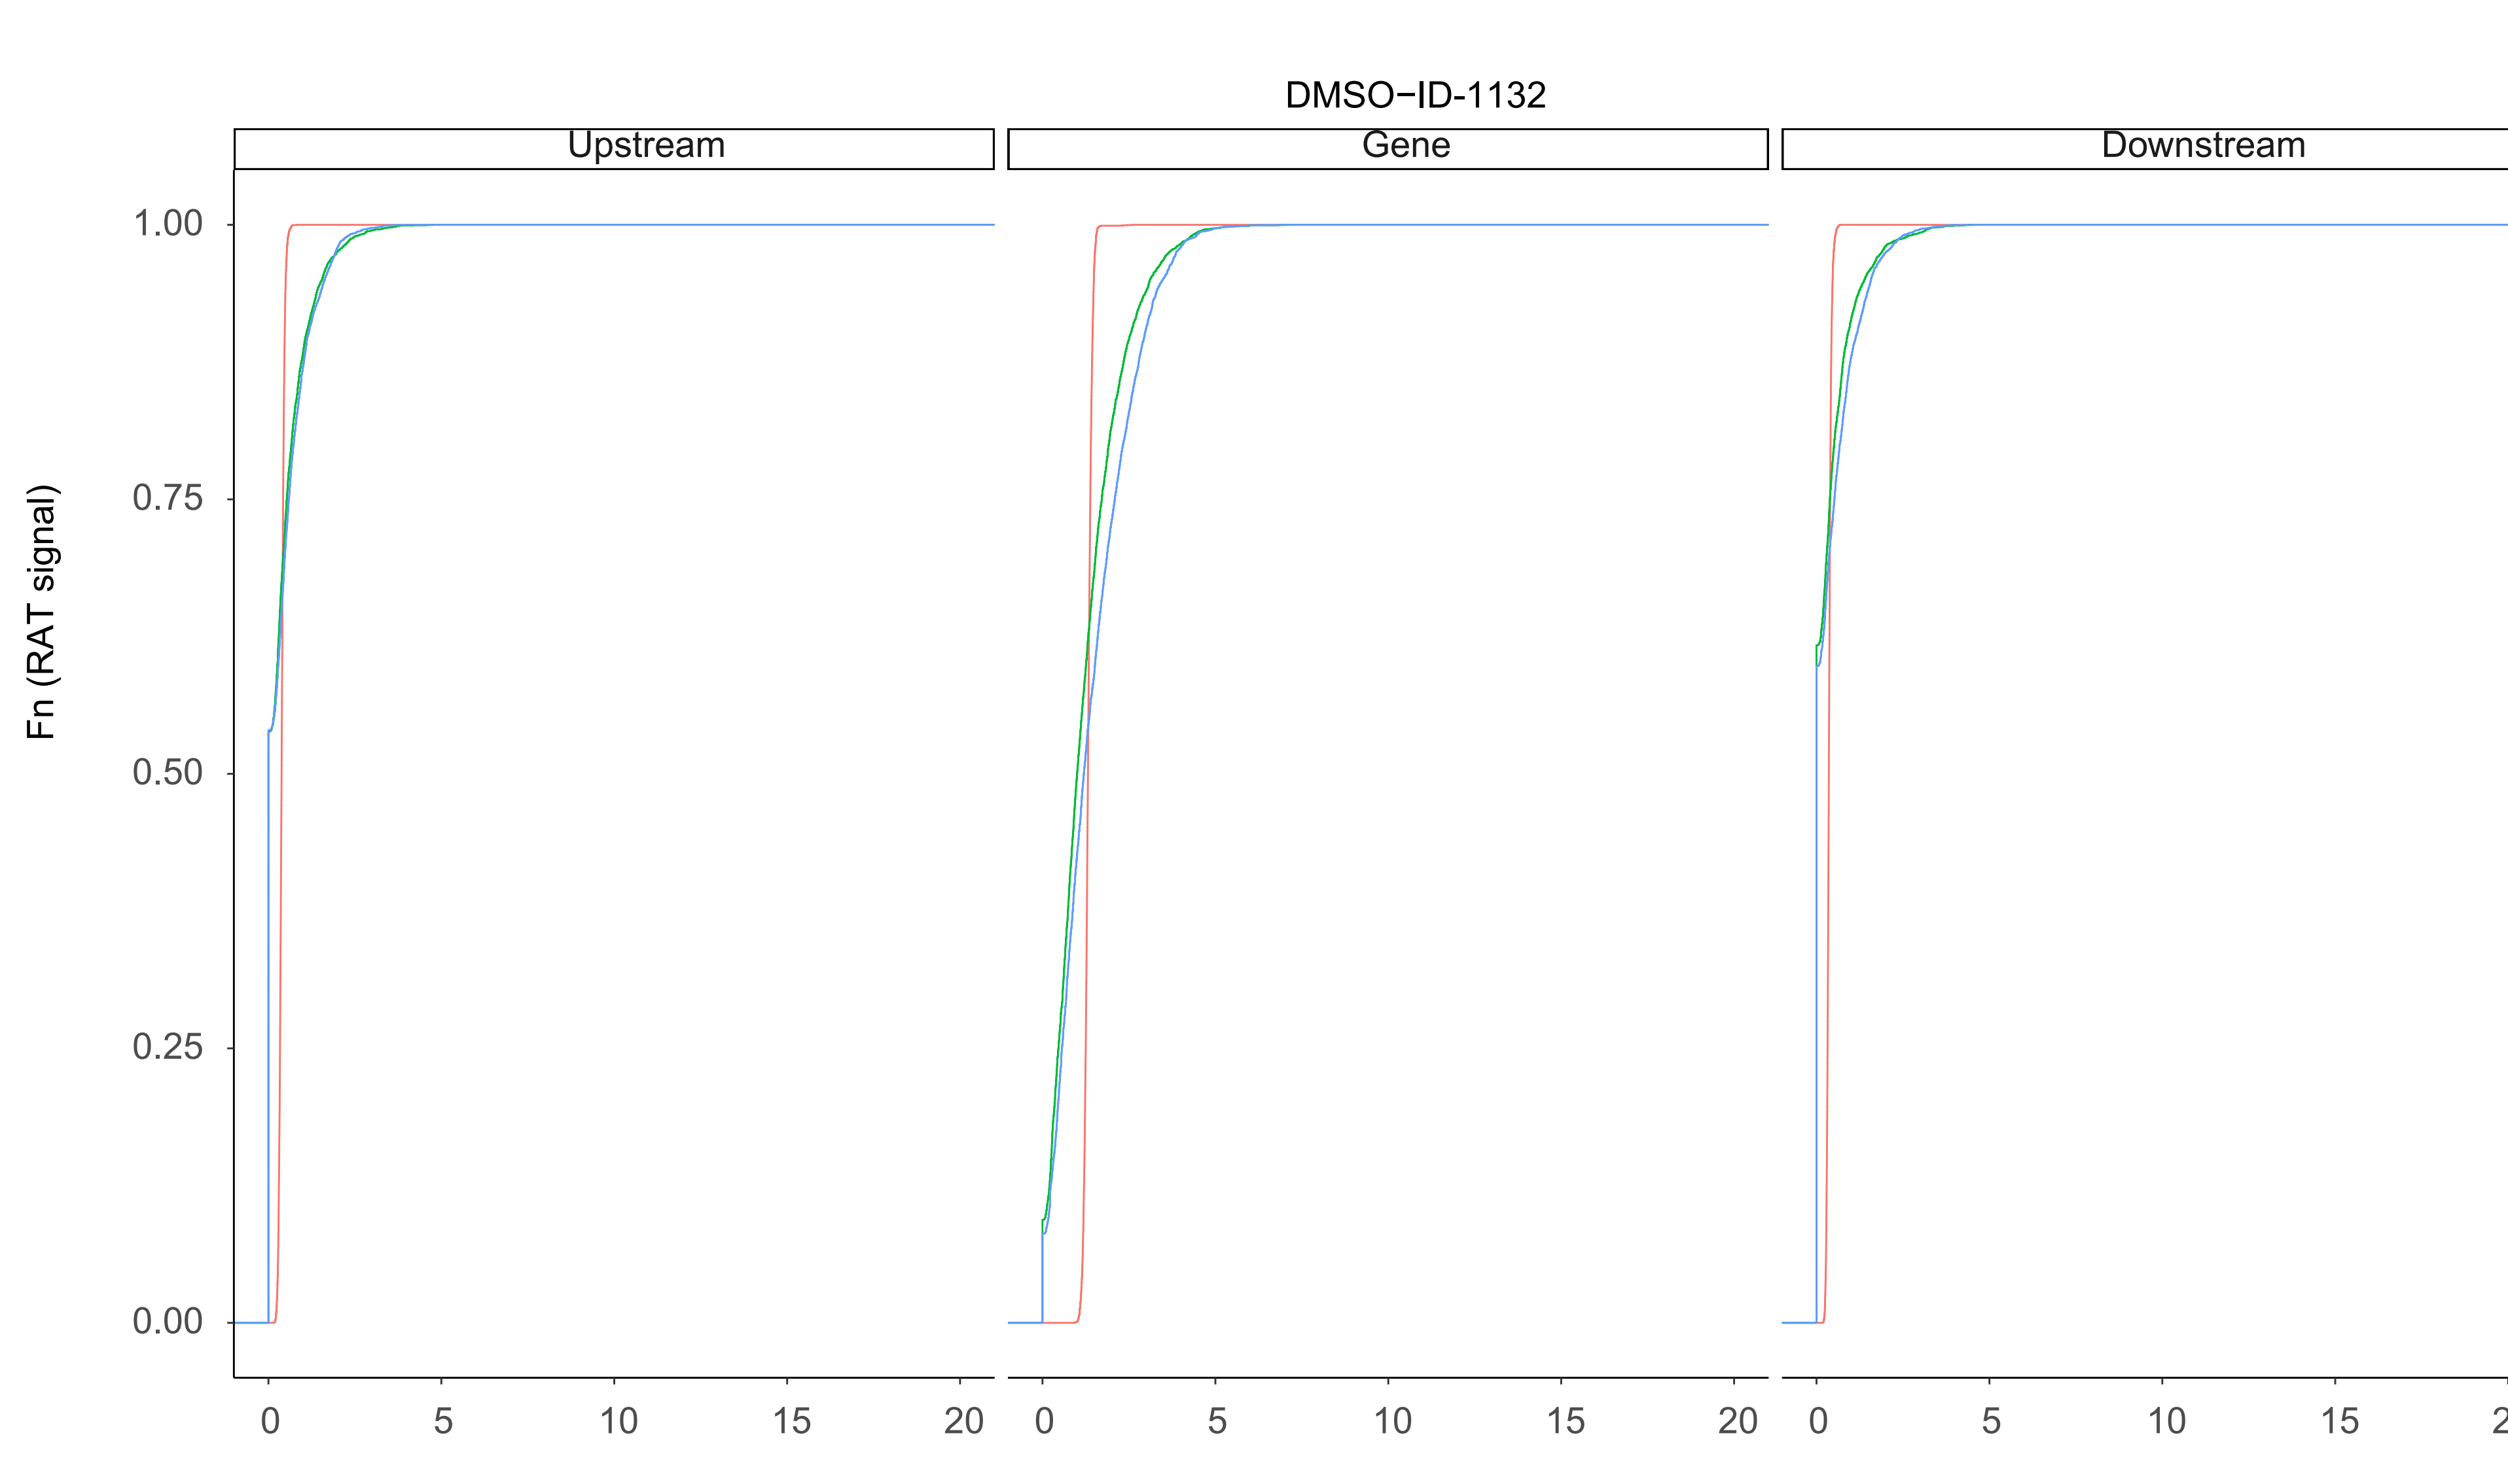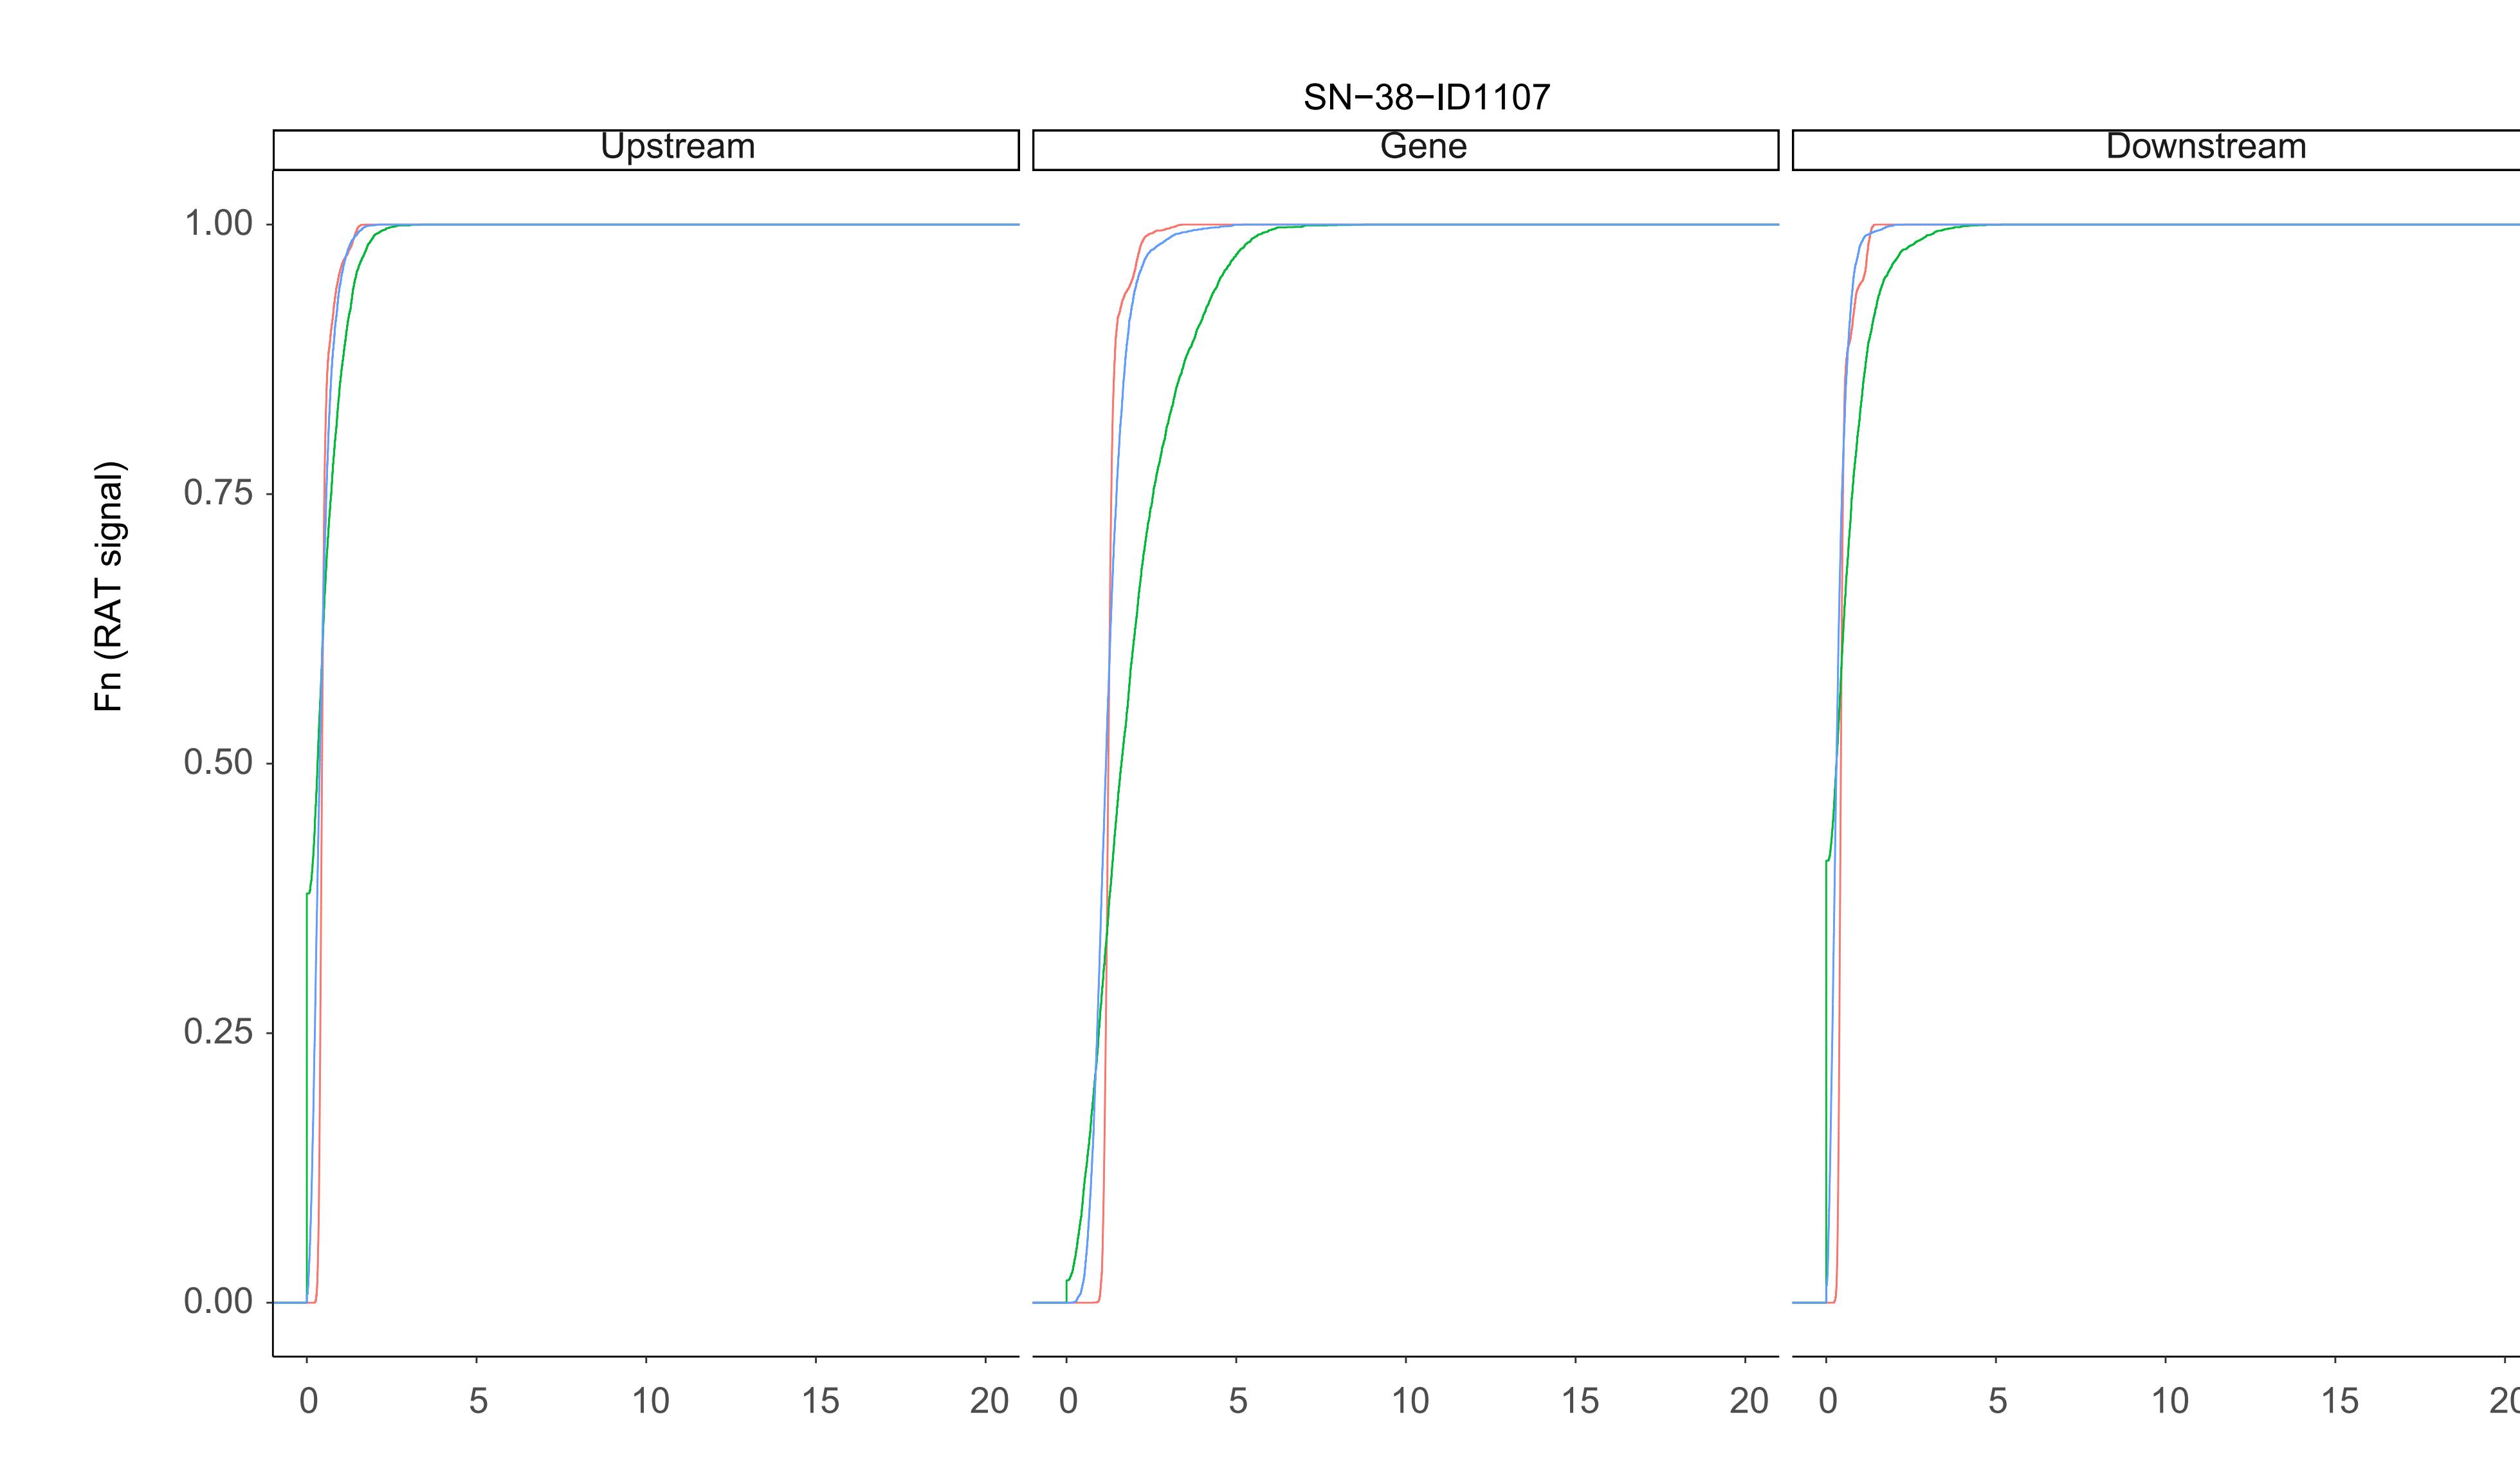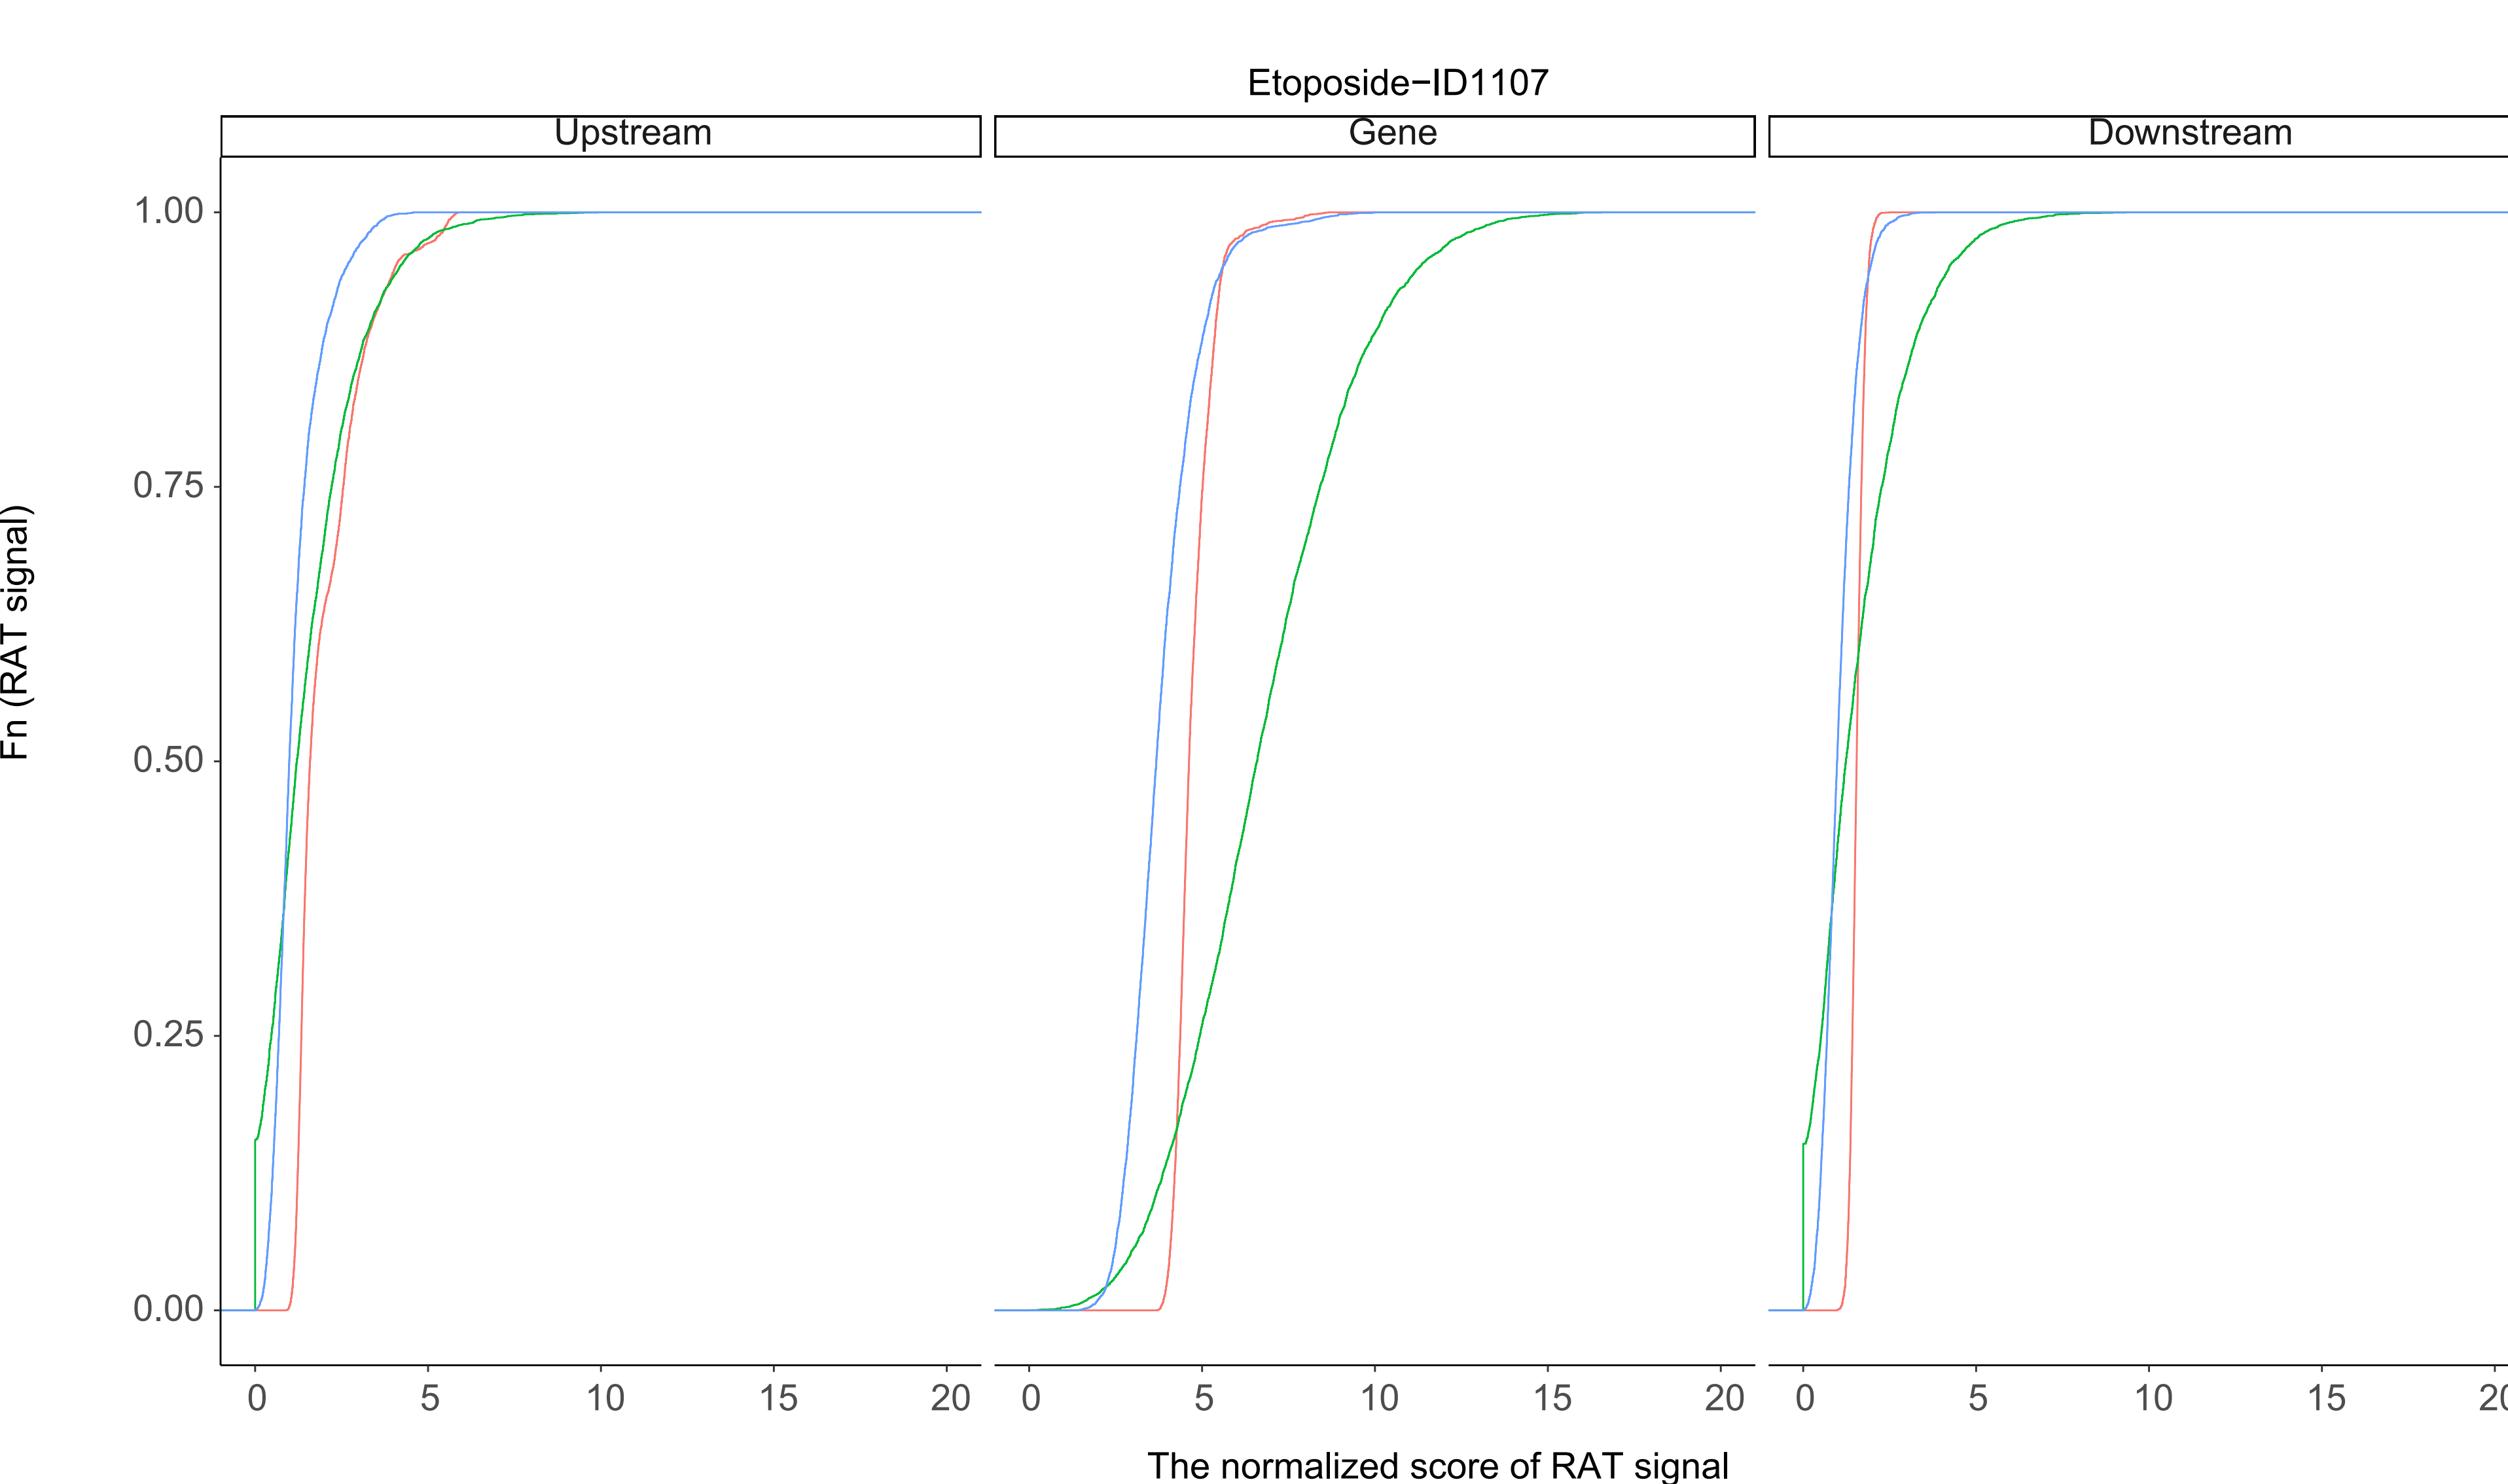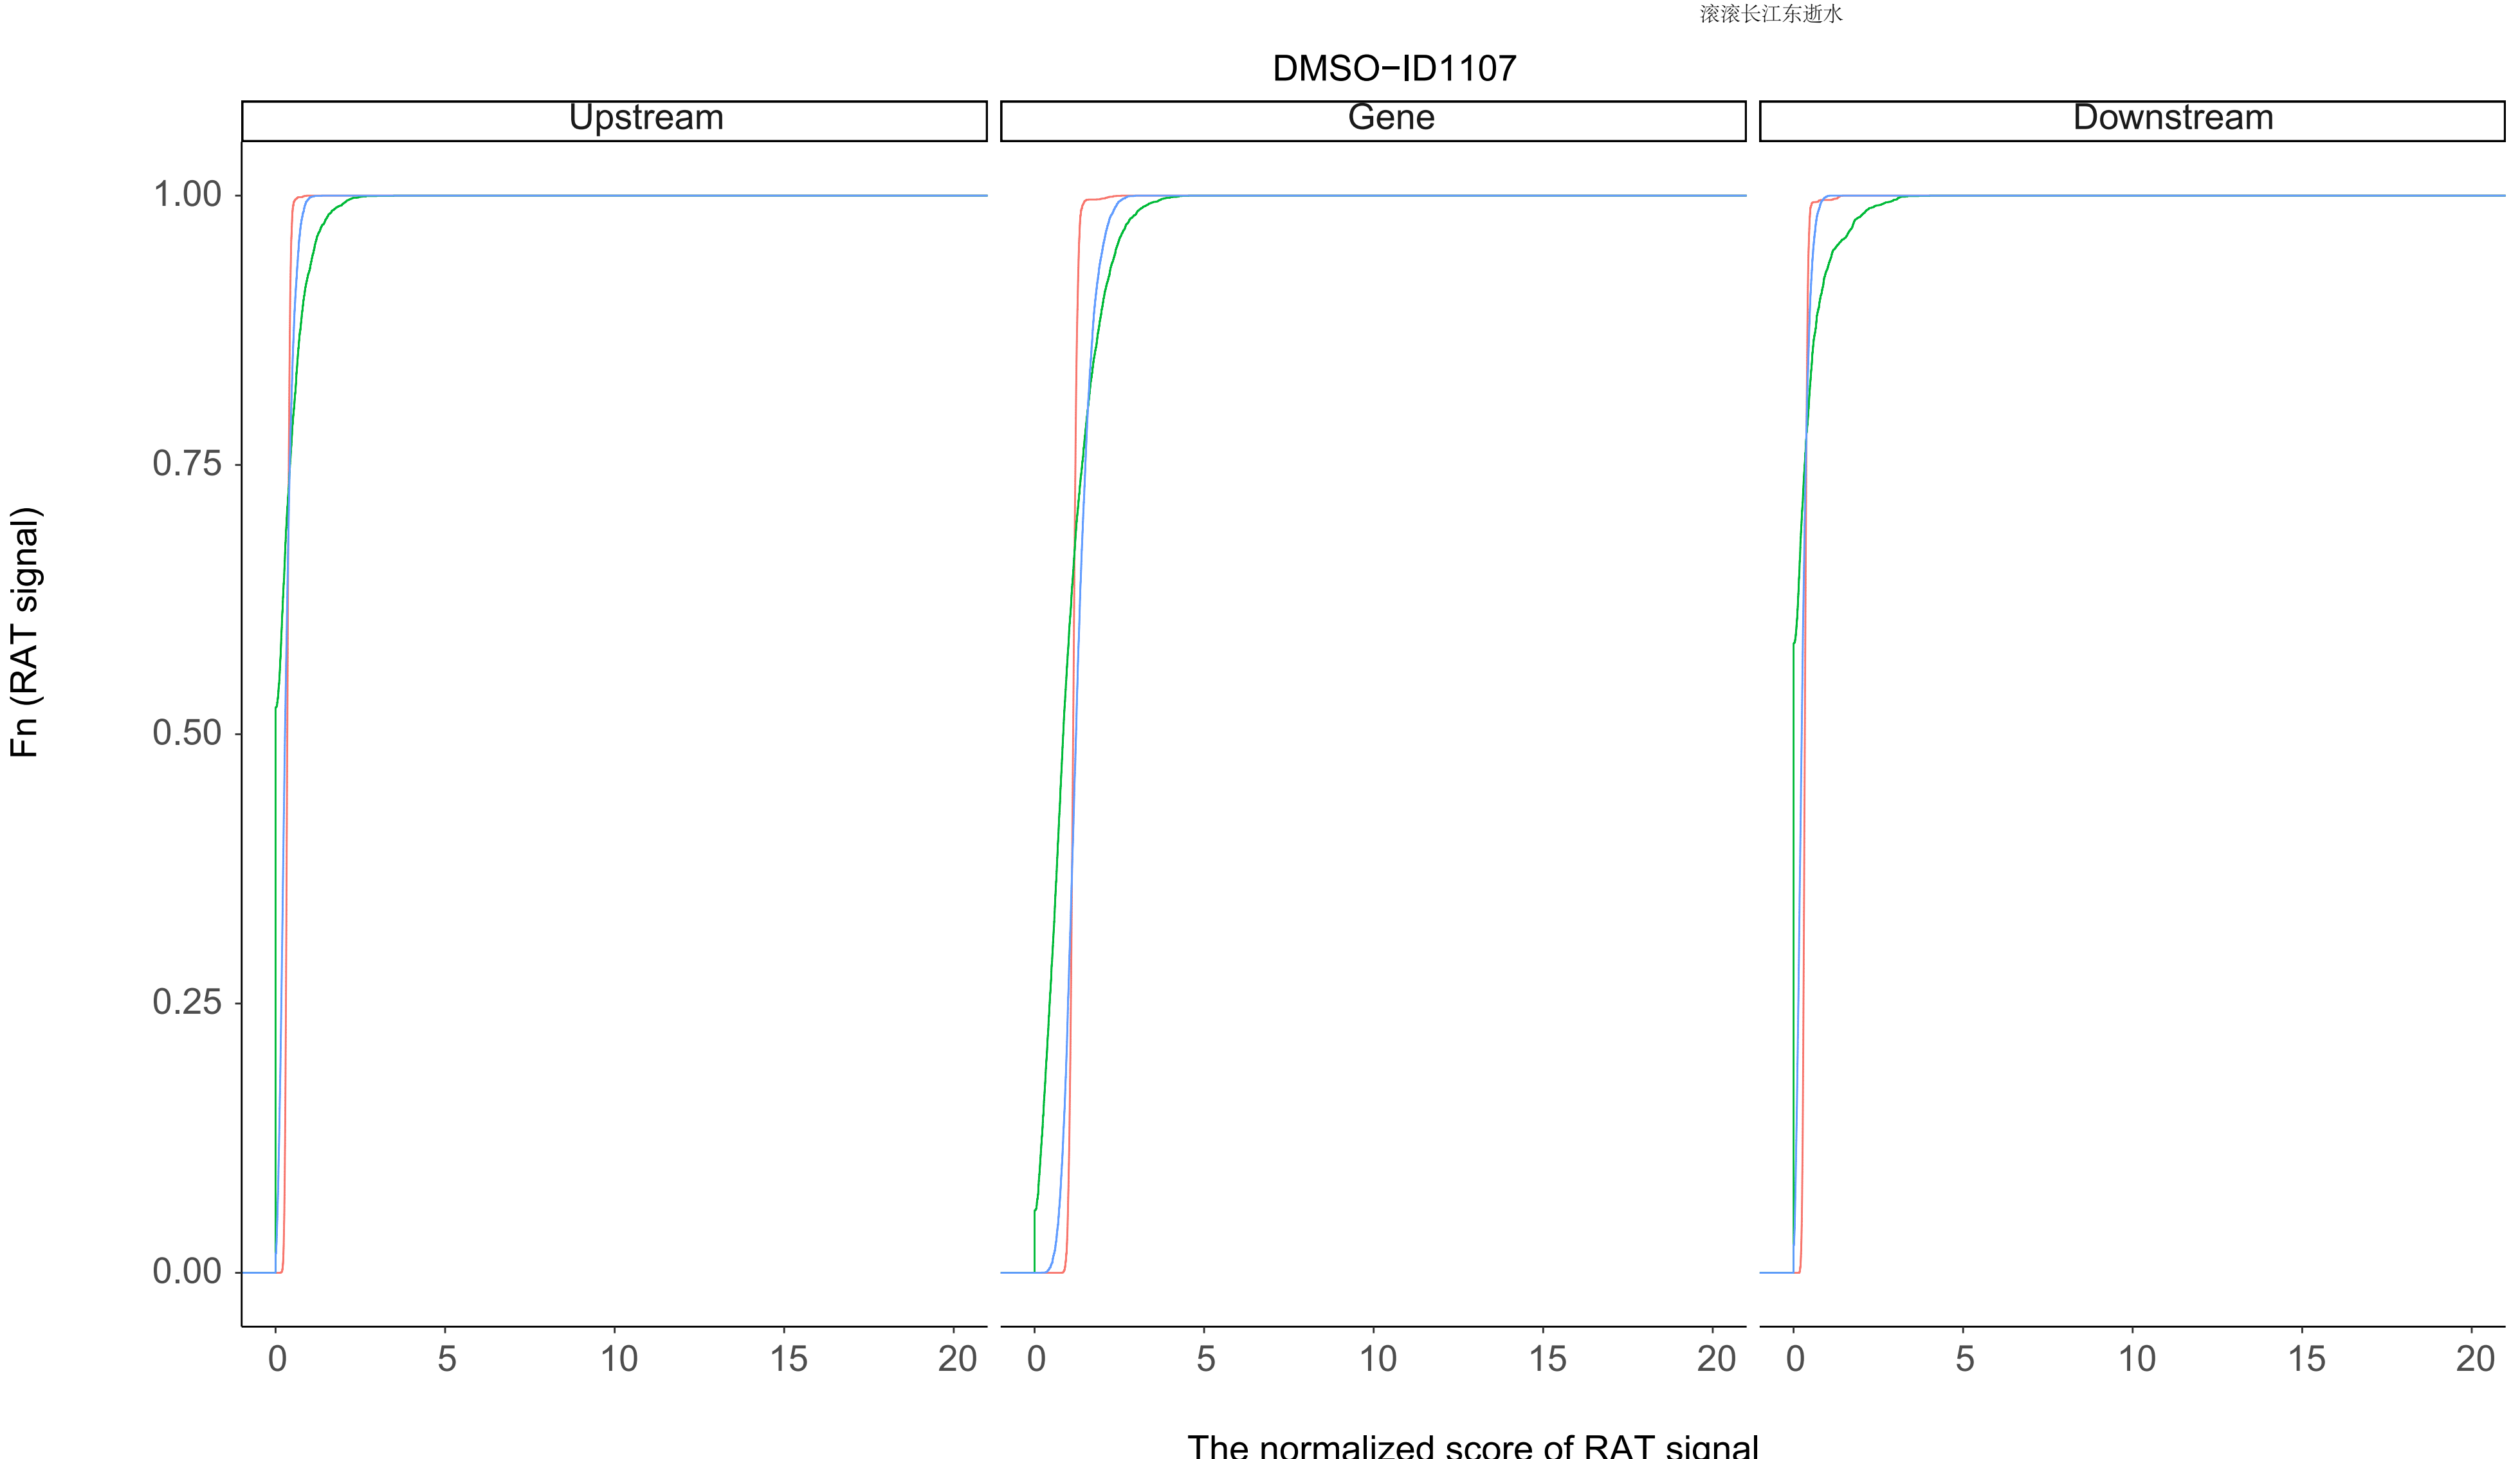

Supplement: 12915_2021_1044_MOESM4_ESM.pdf [file 12915_2021_1044_MOESM4_ESM.pdf]
